*RUNNING TITLE:* Spatial Theta Cells

# **Spatial Theta Cells in Competitive Burst Synchronization Networks: Reference Frames from Phase Codes**

Joseph D. Monaco<sup>1\*</sup>, Hugh T. Blair<sup>2</sup>, Kechen Zhang<sup>1,3</sup>

<sup>1</sup>Biomedical Engineering Department, Johns Hopkins University School of Medicine, Baltimore, MD, USA;

<sup>2</sup>Psychology Department, UCLA, Los Angeles, CA, USA

<sup>3</sup>Department of Neuroscience, Johns Hopkins University, Baltimore, MD, USA

**\*Correspondence:**

Joseph Monaco  
Johns Hopkins University School of Medicine  
Biomedical Engineering Department  
720 Rutland Ave  
Traylor 407  
Baltimore, MD 21205, USA  
jmonaco@jhu.edu

## Abstract

1

2 Spatial cells of the hippocampal formation are embedded in networks of theta cells. The septal  
3 theta rhythm (6–10 Hz) organizes the spatial activity of place and grid cells in time, but it remains  
4 unclear how spatial reference points organize the temporal activity of theta cells in space. We  
5 study spatial theta cells in simulations and single-unit recordings from exploring rats to ask  
6 whether temporal phase codes may anchor spatial representations to the outside world. We  
7 theorize that an experience-independent mechanism for temporal coding may combine with  
8 burst synchronization to continuously calibrate self-motion to allocentric reference frames.  
9 Subcortical recordings revealed spatial theta cells with strong rate-phase correlations related to  
10 distinct theta phases. Simulations of bursting neurons and networks explained that relationship  
11 and, with competitive learning, demonstrated flexible spatial synchronization patterns when  
12 driven by low-dimensional spatial components from the recording data. Thus temporal coding  
13 synchrony may reconcile extrinsic and intrinsic neural codes.

## Introduction

14

15 Neural codes may map sensory or physical dimensions to intensity, like a rate code, or timing,  
16 like a phase code (cf. Brette, 2015). It remains unresolved how the apparent spatial metric  
17 revealed in grid cells (McNaughton et al., 2006; Moser & Moser, 2008) is computed in the brain  
18 as a rate-coding or a phase-coding process (Burak & Fiete, 2009; Zilli et al., 2009). Grid cells  
19 develop after place and border cells (Langston et al., 2010; Wills et al., 2010) and undergo  
20 experience-dependent distortion or control by geometric reference points in asymmetric or  
21 rotated environments (Krupic et al., 2015; Stensola et al., 2015; Savelli et al., 2017). These  
22 findings suggest the grid cell spatial metric is more local and malleable than universal and  
23 absolute. This characterization is at odds with the first-class grid responses formed by  
24 rate-coding continuous attractor models (Fuhs & Touretzky, 2006; Burak & Fiete, 2009) and the  
25 lack of a detailed mechanism for environmental resetting in phase-coding oscillatory  
26 interference models (N. Burgess, 2008; Hasselmo, 2008; Blair et al., 2008). Reconciling these  
27 gaps will elucidate the neural basis of spatial reference frames.

28 How can environmental cues reset a neural code for space? Path integration is the idiothetic  
29 process, analogous to angular integration for head direction (Zhang, 1996; Knierim et al., 1998),  
30 that guides the neural code for position using egocentric motion signals. Interacting with  
31 external sensory cues is critical for path integration to remain calibrated within a fixed spatial  
32 reference frame (Gothard et al., 1996; Etienne et al., 2004), but the nature of the interaction  
33 depends on the neural code. A path-integrating rate code may require direct activation of  
34 sensory associations with the cells coding for position (Widloski & Fiete, 2014). A

35 path-integrating phase code may require temporal phase synchronization with a sensory  
36 feedback signal (Monaco et al., 2011; Blair et al., 2014). Phase-code models (N. Burgess, 2008;  
37 Hasselmo, 2008) have previously implemented resetting as instantly forcing oscillators to zero  
38 phase, similar to experimental stimulation- or task-evoked theta reset (Buzsáki et al., 1979;  
39 Williams & Givens, 2003). Rather than abrupt resets, the spatial calibration of grid cells may be  
40 predominantly mediated by boundaries (Hardcastle et al., 2015) in a way that reflects continuous  
41 gating between extrinsic and intrinsic information streams (Carpenter et al., 2015; Savelli et al.,  
42 2017). It is unclear how place-to-grid feedback may support this form of calibration in attractor  
43 network or phase synchronization models.

44 Which pathway would place-to-grid feedback take? The hippocampal formation is itself a  
45 loop-like structure, but subregions CA1/CA3 also form bidirectional loops with subcortical  
46 structures that regulate the septo-hippocampal theta rhythm (6–10 Hz; Leranath et al., 1999;  
47 Ruan et al., 2017). Theta-rhythmic activity propagates through the circuits of the septum,  
48 mammillary bodies, and anterior thalamus via excitatory burst synchronization (Vertes et al.,  
49 2001; Tsanov et al., 2011; Welday et al., 2011). Bursting aids neurocomputation and signal  
50 transmission by overcoming synaptic failure, facilitating transmitter release, selecting resonant  
51 inputs, and/or evoking synaptic plasticity (Lisman, 1997; Izhikevich, 2007). In this paper, we  
52 study the hypothesis that theta bursting and spatial inputs create a spatial phase code that  
53 supports flexible learning of spatial synchronization patterns. We theorize that this spatial phase  
54 code is reflected in correlations between firing rate and phase. We recorded theta cells from a  
55 constellation of hippocampal and subcortical areas in freely exploring rats to look for spatial  
56 phase information and rate-phase correlations. We modeled intrinsic theta bursting in oscillatory



57 neuronal network models to demonstrate 1D and 2D phase-code synchronization to,  
58 respectively, artificial and path-integration-like phase codes. We discuss the results with respect  
59 to the hippocampo-entorhinal spatial metric, but the rate-to-phase calibration mechanism may  
60 subserve other brain systems.

## 61 **Results**

62 Our approach combines mechanistic models of burst synchronization with information theoretic  
63 and statistical modeling analyses of theta cell recordings. First, we present 1D simulations of  
64 spatial bursting cells that test how they entrain a nonspatial target neuron to a spatial phase  
65 code. Second, we present open-field recordings of theta cells in rats to quantify spatial phase  
66 coding and study a statistical model to isolate trajectory-based confounds of spatial activity.  
67 Third, we construct a 2D data-driven generative model of spatial inputs for competitive bursting  
68 network simulations that characterize dynamical constraints on environmental phase attractors.

### 69 **Spatial ‘phaser’ bursting models lock to distinct theta phases**

70 To model spatial theta cells, we defined a two-variable, nonlinear integrate-and-fire model of  
71 intrinsic bursting, meaning that the bursting derives from internal dynamics and not external  
72 fluctuations. This bursting model (Methods) is a variation on Izhikevich’s hippocampal  
73 low-threshold burster (Izhikevich, 2007, p.310), which can fire single spikes or bursts of varying  
74 intensity depending on input strength. Its dynamics implement burst termination with adaptive  
75 feedback analogous to the slow calcium- or voltage-gated activation of outward currents ( $I_{AHP}$ )

76 or  $I_{K(Ca)}$  observed in hippocampal and midbrain bursting neurons (Traub et al., 1991; Amini et  
77 al., 1999). For recording phase, spiking simulations (Methods) tracked a reference theta wave at  
78  $f_{\theta} = 7.5 \text{ s}^{-1}$ , the typical burst rate of our theta-cell data below.

79 Mehta *et al* (2002) posited that combining inhibitory theta input with excitatory ramping input is a  
80 robust mechanism for creating a temporal code from a rate code: Lower excitation delays firing  
81 to the periodic inhibitory minimum (theta trough) and higher excitation advances firing until  
82 maximum inhibition (theta peak). This precession of activity conveys information about the  
83 rate-coded input in the theta phase of the output (Discussion).

84 To test temporal coding in the theta-bursting model, we implemented the Mehta mechanism by  
85 combining theta inhibition with excitation from a ramping input function  $F_{\text{ramp}}$  (equation (4);  
86 Methods). With certain bursting (Table 2) and gain (Table 3) parameters, we call this a ‘phaser’  
87 cell. We demonstrate a phaser cell simulation (Figure 1A) in which  $F_{\text{ramp}}$  is a triangle wave  
88 (green). For low excitatory input, the phaser (Figure 1A, blue trace and spike raster) emits single  
89 spikes near theta peak (zero phase) every few theta cycles (gold highlights, *Low1* and *Low2*). For  
90 high excitatory input, the phaser bursts with spike triplets near theta trough ( $-\pi/\pi$  phase) every  
91 other theta cycle (gold highlight, *High*). This cycle-skipping rhythmicity is consistent with  
92 observations in medial entorhinal cortex and the head direction system (Deshmukh et al., 2010;  
93 Brandon et al., 2013; Discussion). Expanded intervals (Figure 1B) reveal the range of burst  
94 modulation (blue traces) and the shift in timing to earlier phases (middle) relative to the reference  
95 theta wave (magenta). More frequent bursts at earlier theta phases suggest the negative  
96 correlation between rate and phase entailed by the Mehta mechanism (2002). To quantify this  
97 correlation, we sampled spiking for a longer triangle wave with a varying cycle period. Phase

98 distributions and the rate-phase correlation ( $n = 399$  nonzero input bins out of 512;  $r = -0.809$ ;  
99 Figure 1D) show clear precession from peak to trough (0 to  $-\pi$ ) across average firing rate. Thus  
100 this ‘negative’ phaser forms a Mehta-like phase code of its input function that will most strongly  
101 entrain a post-synaptic target to the trough of the theta rhythm.

102 How can a minimal bursting model entrain more than one phase? We propose a parsimonious  
103 mechanism allowing for simultaneous entrainment to theta peak: A theta cell with strong  
104 excitatory theta input whose activity is suppressed by a negative phaser. To avoid the additional  
105 degrees-of-freedom and parameter tuning for an interneuronal subnetwork, we modeled the  
106 lateral inhibition as feedforward inhibition with a slow 100-ms conductance (equation (5);  
107 Table 3). The ‘positive’ phaser (Figure 1A, orange trace and spike raster) bursts in-phase with  
108 theta when disinhibited by weak input to the negative phaser (highlights, *Low1* and *Low2*;  
109 Figure 1B, top and bottom). The negative and positive phasers fire in complementary patterns as  
110 the input changes across the simulation (Figure 1A). The positive phaser appears to precess with  
111 stronger inputs (Figure 1C), but the suppressive inhibition means that its firing rate is increasing  
112 as the external input goes to zero. Thus the rate-phase correlation mediated by the input is  
113 positive ( $n = 351$  nonzero input bins out of 512;  $r = 0.705$ ; Figure 1E). This positive phaser  
114 procession is shallower than the negative phaser precession (Figure 1D) that is directly driven by  
115 the external input. Thus a simple connectivity pattern between theta cells may permit  
116 multiplexed entrainment to the peak and trough of the theta rhythm.

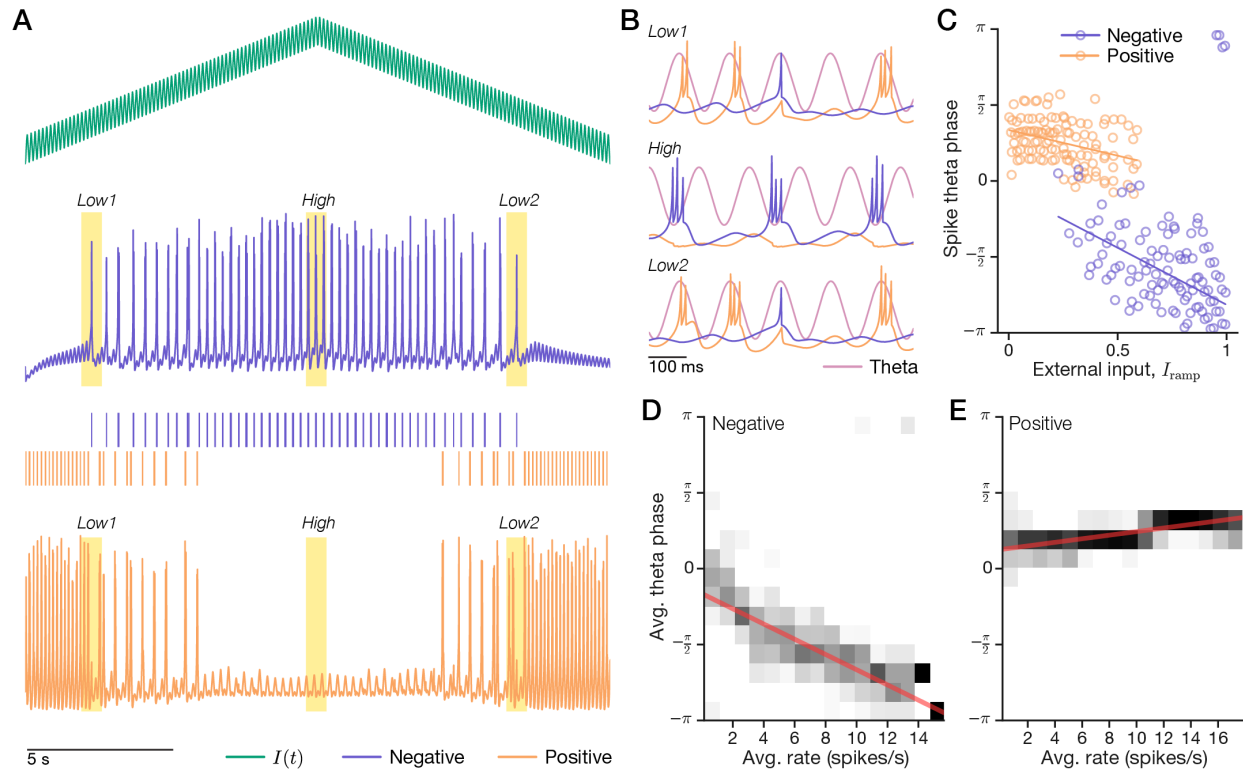

**Figure 1 | Excitatory input to theta-bursting neuron models creates rate-phase correlations.** A bursting model (blue, ‘negative’) with combined external and theta input (green) suppresses another bursting model (orange, ‘positive’). (A-C) A 20-s simulation. (A) A triangle-wave input (top) produced a range of spiking (*Low1*, *Low2*) and bursting (*High*) in the negative cell (middle) and a complementary pattern in the positive cell (bottom). (B) Expanded intervals show the reference theta wave (magenta). (C) A scatter plot shows spike theta-phase across input levels. Stronger inputs caused earlier firing (phase precession) in the negative cell and silenced the positive cell. Lines, circular-linear regressions. (D+E) A 1-hr simulation of 10-s to 62-s triangle-wave cycles sampled average firing rates and phases. Rate-phase correlations (grayscale, phase distributions conditioned on rate) revealed that input level comodulated rate and phase. For higher firing rates, the negative cell strongly precessed to earlier phases (D) but the positive cell processed more weakly to later phases (E). Red lines, circular-linear regressions.

## 117 Competitive learning synchronizes a 1D spatial phase code

118 Can these phaser cells create spatial synchronization patterns? We constructed a 1D spatial  
 119 model from 64 spatial tuning functions, each representing a particular location similar to a place  
 120 field. However, if these were the only spatial inputs, then the complementary firing patterns of  
 121 negative and positive phasers (Figure 1A) would entail that positive phasers only have  
 122 long-range, not local, spatial responses. To equalize the diversity of spatial responses between

123 negative and positive phasers, we added 64 ‘inverse’ spatial functions representing the  
 124 long-range complements of the local tuning functions (Figure 2A, purples; Methods). Each of  
 125 these spatial inputs drives one of 128 negative phasers (Figure 2A, blues) connected  
 126 (equation (5)) to one of 128 positive phasers (oranges). Example ( $x = 0.5$ ) joint space-phase  
 127 distributions for the 4 phaser/tuning subtypes (Figure 2B) show the resulting spatiotemporal  
 128 patterns available for synchronization (for the entire network, see Supplementary Figures 1–4).

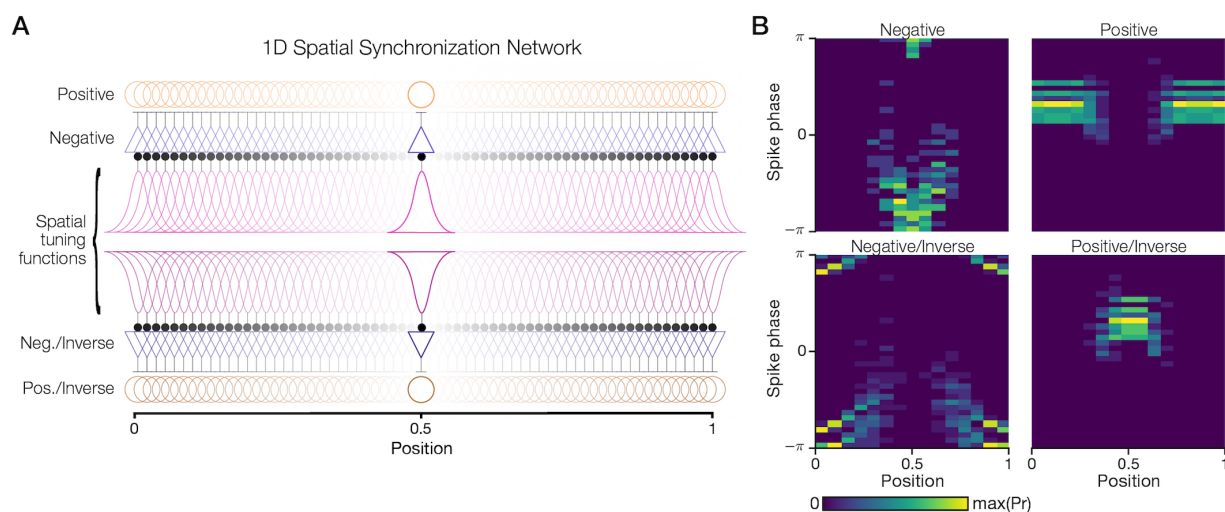

**Figure 2 | A 1D spatial network creates a palette of space-phase distributions.** A set of 64 local tuning functions for a 1D space on  $\{0, 1\}$  and their corresponding inverse (long-range) tuning functions drive 128 pairs of negative/positive model phasers. (A) The tuning functions (purples: upper/local, lower/inverse) evenly cover the space and excite (filled circles) the negative phasers (blues). The negative phasers in turn suppress (T-bars) their paired positive phasers (oranges). The subnetwork at 0.5 is highlighted. (B) A 1-hr simulation sampled spike phase for a 1-min triangle-wave trajectory spanning the space. For the highlighted phasers in (A), the resulting joint space-phase distributions of spike timing create distinct spatiotemporal patterns around the theta trough ( $-\pi/\pi$  phase) and the falling phase ( $\{0, \pi/2\}$ ).

129 Can this phaser activity entrain a 1D spatial phase code? We devised a binary phase-code  
 130 target consisting of an anti-phase fixed point near  $x = 0$  and an in-phase fixed point near  $x = 1$   
 131 (Figure 3A). This pattern associates the opposing ends of the space with opposing phases of the  
 132 theta cycle. We computed the vector cosine similarity between the phasers’ joint space-phase  
 133 distributions and the phase-code target as a basis for competitively selecting active synapses  
 134 (Methods). This winners-take-all (WTA; Table 4) method competed local against long-range

135 (inverse) phasers within the negative/positive phaser subtypes. The resulting weights (Figure 3B)  
 136 show the anti-phase fixed-point supported by negative/local phasers (left) and the in-phase  
 137 fixed-point supported by positive/inverse phasers (right). To visualize the trained network, a  
 138 weighted average of the phaser distributions (Figure 3C) revealed a qualitative match to the  
 139 phase-code target in which the anti-phase mode (right) was more sharply defined than the  
 140 in-phase mode (left). This pattern suggests spatial synchronization with phasers is possible.

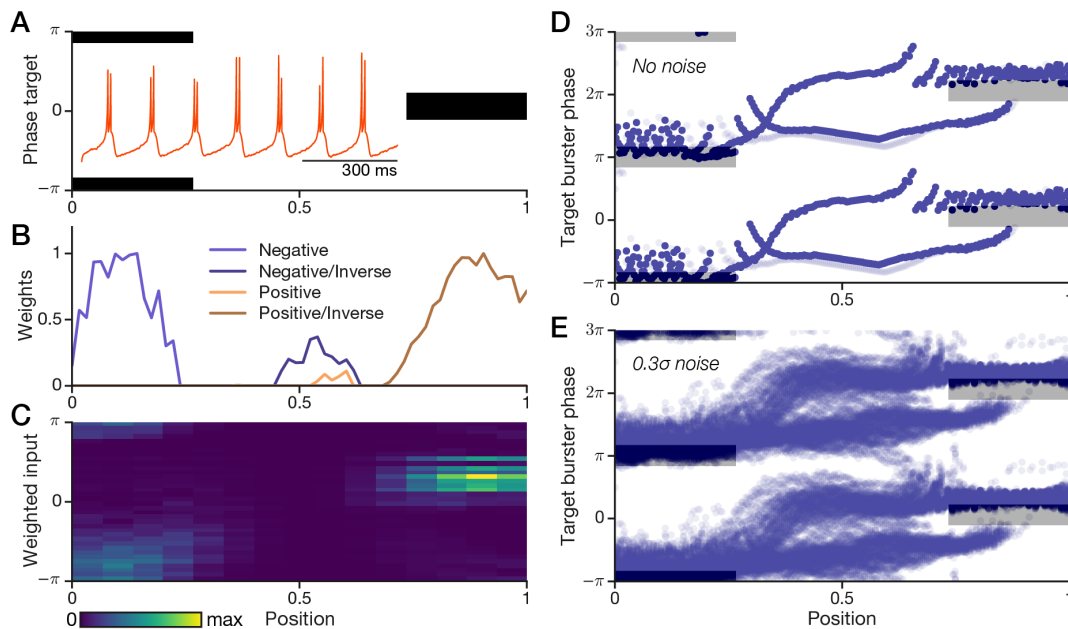

**Figure 3 | Competitively trained phasers synchronize a theta cell to a phase code.** We devised an artificial spatial phase code and a nonspatial theta-cell model; competitive weights associating the 1D phaser network (Figure 2A) to the phase code allowed phaser input to spatially synchronize the theta cell. (A) The phase code target (black) has an anti-phase mode (left,  $-\pi/\pi$ ) and an in-phase mode (right, zero phase). The target bursting cell (inset) random-walks across theta phase (Supplementary Figure 5). (B) Competitive 20%-winners-take-all weights (Methods). (C) Weighted average of the joint space-phase distributions of the phaser network. (D+E) Hour-long simulations of the target theta-cell burst timing on a 1-min triangle-wave trajectory between 0 and 1. The theta cell was simulated without (D) and with (E) intrinsic phase noise. Multiple theta cycles are shown ( $y$ -axis) for clarity.

141 To test phaser synchronization of downstream neuron, we created an intrinsic theta-bursting cell  
 142 with simplified bursting dynamics (equation (6); Table 4; Methods) that emits doublets without  
 143 cycle skipping. The intrinsic burst rate was approximately tuned to the reference theta frequency  
 144  $f_\theta$ . Without phaser input, this ‘target burster’ (Figure 3A, inset) randomly drifts across theta

145 phase with a noise value ( $\sigma$ , Table 4) that randomizes its phase across a 30-s simulation  
146 (Supplementary Figure 5). To verify synchronization to the phase-code target, we simulated the  
147 phaser-target network with triangle-wave trajectories (1-min period, 1-hr duration). Plots of burst  
148 timing for simulations (Methods) without noise (Figure 3D) and with noise (Figure 3E) reveal  
149 stereotyped phase trajectories locked to both the in-phase and anti-phase fixed points (gray  
150 rectangles). The upper branch of the synchronization pattern, moving left toward  $x = 0$ ,  
151 smoothly precesses to the earlier anti-phase fixed point; the lower branch, moving right toward  
152  $x = 1$ , slowly processes to the fixed point until jumping discontinuously ahead of it (Figure 3D+E).  
153 The height of the burst-timing channels on either side, approximately a quarter cycle  
154 (Figure 3D+E), indicate the degree of phase misalignment tolerated in the target burster. While  
155 this tolerance shows the phaser synchronization does not act perfectly, it robustly prevents  
156 substantial drift from the phase-code target. This pattern holds across a range of noise levels  
157 and input gains (Supplementary Figure 6). Thus a spatial network of phaser cells can robustly  
158 synchronize a noisy theta-bursting neuron to an artificial spatial phase code.

### 159 **Theta cell recordings reveal spatial phaser patterns**

160 To study space-phase representations in biological theta cells, we recorded single-unit data  
161 from rats foraging an open 80-cm cylindrical arena with tetrodes in theta-rhythmic sites  
162 including septum, hippocampus, thalamus, midbrain, and other subcortical areas (Methods).  
163 Recording sessions were longer than typical spatial navigation experiments ( $n = 110$ ; mean, 2.1  
164 hours; range, [0.76, 3.28]) to sufficiently sample phase differences across the environment. In all,

165 671 uniquely identified theta cells were recorded in 8 rats, resulting in 1,073 cell-session  
166 recordings for analysis.

167 Some theta cells were clearly modulated by space. An example spatial theta cell from the lateral  
168 septum fired preferentially on the west/southwest half of the arena (Figure 4A) with a peak  
169 firing-rate around 12 spikes/s (Figure 4B) on an adaptively-scaled spatial map of average firing  
170 rate ('ratemap'; Methods). To verify this as a theta cell, its temporal autocorrelation (Figure 4C)  
171 revealed a theta rhythmicity index of 0.392 and its phase distribution relative to the hippocampal  
172 local field potential (LFP) theta rhythm (Figure 4D) revealed a theta modulation index of 0.288  
173 (Methods) and a preference for anti-phase ( $-\pi/\pi$ ) activity. However, the spatial map of average  
174 firing phase ('phasemap'; Figure 4E) shows that the cell preferred in-phase firing (greens) in low  
175 firing-rate regions, and anti-phase (pinks) in high firing-rate regions. We computed 'coherence  
176 maps' by darkening phasemap pixels by phase variance (Methods). The coherence map  
177 (Figure 4F) shows that the spatial phase pattern holds in the arena center, but loses coherence  
178 along the west wall. Example intervals of spikes and LFP theta-phase show the transition from  
179 single spikes to bursts between periods of low and high firing rates (Figure 4G). Does this spatial  
180 theta cell carry correlations between rate and phase, as predicted by the Mehta mechanism?  
181 Indeed, the rate-phase correlation (Figure 4H) reveals a strong negative relationship  
182 (circular-linear regression:  $n = 3,190$  pixels,  $r = -0.836$ ; Methods) similar to our negative phaser  
183 model (Figure 1C, blue). Thus some theta cells may convert spatial inputs into spatial phase  
184 codes.

185 Are rate-phase correlations characteristic of spatial phase codes in theta cells? We computed  
186 spatial phase information  $I_{\text{phase}}$  with critical value  $\alpha = 0.02$  (Methods). Theta cell recordings with



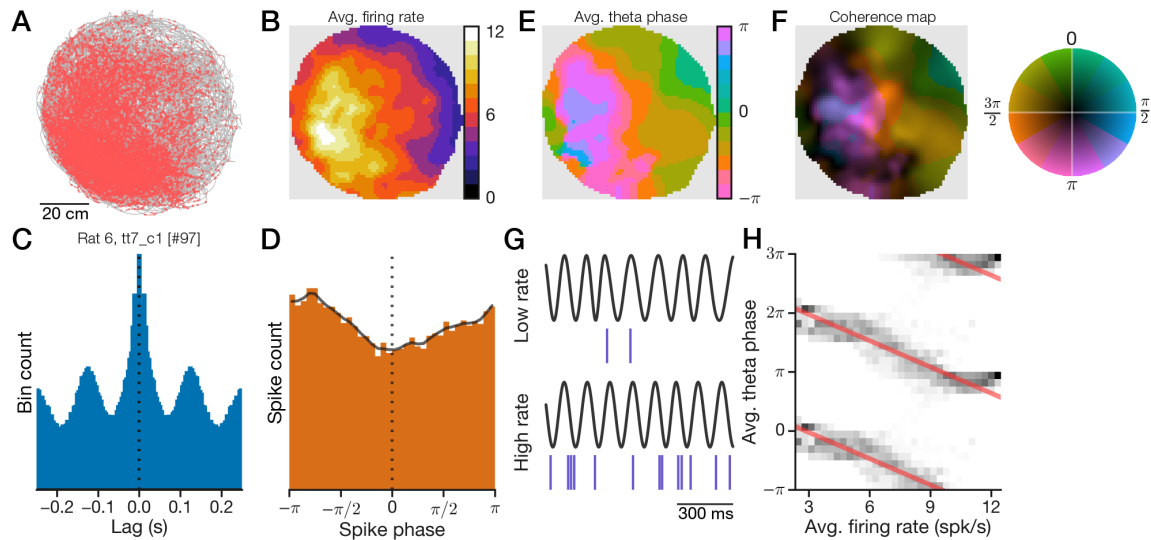

**Figure 4 | An example theta cell has spatial rate-phase correlations.** Recordings from subcortical theta cells were made in rats exploring an 80-cm cylinder for long durations. (A) Spikes (red dots) from a lateral septal cell demonstrated spatial selectivity for one side of the arena (gray line, trajectory). (B) Adaptively smoothed map (Methods) of average firing rate. (C) Spike autocorrelogram (for computing theta rhythmicity index; Methods). (D) Distribution of spike phase relative to hippocampal theta (gray line, 10° moving average for computing theta modulation index; Methods). (E) Map of average theta-phase of firing. (F) Average phases from (E) composited with a saturation mask representing maximum-normalized phase coherence. Inset, phase-coherence color wheel. (G) Sample 1-s traces of LFP theta rhythm and spikes for low/high (top/bottom) periods of firing. (H) Conditional phase distributions along rate (grayscale), based on average rate (B) and phase (E) pixels, with circular-linear regression lines (red). Multiple theta cycles shown for clarity.

187 statistically significant  $I_{\text{phase}}$  ( $n = 233$ ) have peak firing rate (median, 7.35 spikes/s), estimated  
 188 burst frequency ( $7.66 \pm 0.44 \text{ s}^{-1}$ ), and theta rhythmicity index (median, 0.365) values  
 189 comparable to those of nonspatial cells (Supplementary Figure 7). Spatial recordings  
 190 demonstrated a wide range of  $I_{\text{phase}}$  values (median, 0.36 bits; range, [0.012, 3.67];  
 191 Supplementary Figure 8A). How does spatial phase information relate to rate-phase  
 192 correlations? Based on circular-linear regressions for each cell (like Figure 4H, red lines), we  
 193 estimated the total phase shift for each recording (Methods). Total phase shifts for nonspatial  
 194 recordings (Figure 5A, contours) were distributed around zero regardless of  $I_{\text{phase}}$ , whereas total  
 195 phase shifts for spatial recordings (blue circles) were strongly negative or positive even for low  
 196  $I_{\text{phase}}$  values. Both rate-phase correlation coefficients and total phase shifts were more broadly

197 distributed for spatial cells than nonspatial cells (Supplementary Figure 8). Thus spatial theta  
 198 cells may carry spatial phase information via negative and positive rate-phase correlations.

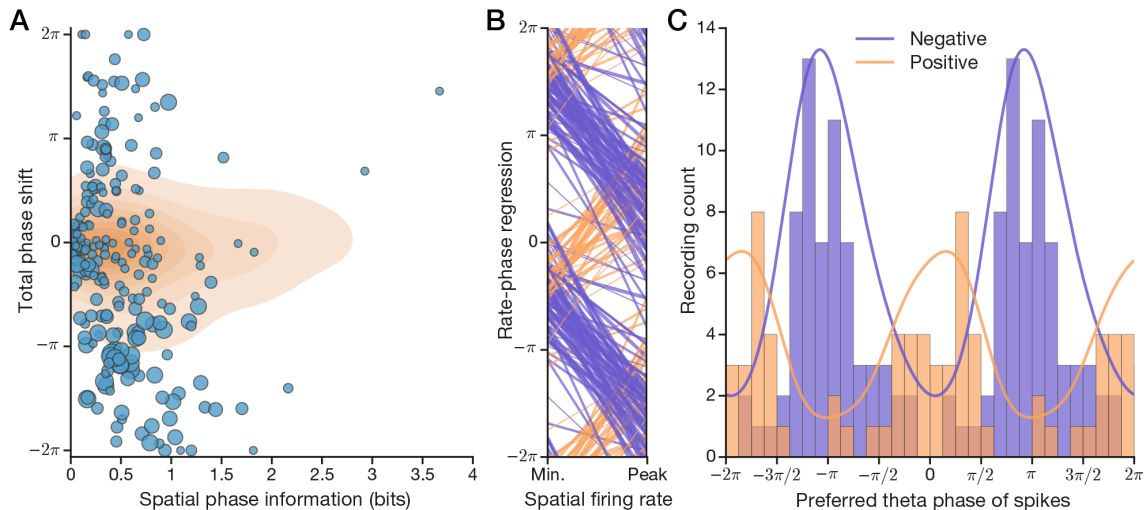

**Figure 5 | Biological phasers split into theta-segregated negative/positive subtypes.** (A) To find phaser-like recordings, we compared spatial phase information with the total phase shift estimated from rate-phase correlations of all theta cells. Background contours show the distribution of 840 nonspatial theta cell recordings. Circles show 233 spatial recordings; circle size increases with correlation strength. (B+C) Phaser criteria (Results) selected 101 spatial recordings. Multiple theta cycles shown for clarity. (B) Rate-normalized rate-phase regression lines for negative (blue) and positive (orange) biological phaser recordings. (C) Preferred theta phases for negative/positive phasers are shown as histograms (positive composited over negative) and kernel-density estimates (lines,  $\pi/4$  bandwidth Gaussian). On average, negative/positive phasers prefer anti-phase/in-phase firing.

199 What do these spatial phase-coding theta cells look like? Let's define criteria for 'biological  
 200 phaser' cells: peak firing rate  $\geq 3.5$  spikes/s, significant  $I_{\text{phase}} \geq 0.1$  bits, significant rate-phase  
 201 correlation  $|r| > 0.2$ , and absolute phase shift  $\geq \pi/4$ . These criteria select 101/233 spatial  
 202 recordings from 5/8 rats (Supplementary Figure 9). Like the model phasers, biological phasers  
 203 had functional subtypes based on whether they fired earlier (negative,  $n = 65$ ) or later (positive,  $n$   
 204  $= 36$ ) at higher firing rates. To evaluate their temporal organization, the rate-phase regression  
 205 lines for each cell (Figure 5B) show that negative (blue) and positive (orange) phasers started  
 206 firing during the rising phase of theta ( $\{-\pi, 0\}$ ) and then, with increasing firing rate, precessed or  
 207 processed on opposing paths to the falling phase ( $\{0, \pi\}$ ). This rate-modulated phase pattern

208 spans the theta cycle, but on average the negative phasers preferred trough firing and the  
209 positive phasers preferred peak firing (Figure 5C) as predicted by the model phasers (Figure 1C).  
210 Phaser cells constituted 13.2% of recordings from the septum (Table 1) where they were found  
211 predominantly in the dorsal/intermediate aspects of lateral septum (Supplementary Figure 10).  
212 For negative phaser cells (Figure 6A-E), ratemaps (top row) revealed diverse spatial  
213 representations including place-like fields (A+B), broad gradient-like fields (C+D, showing  
214 remarkably similar responses from different rats), and boundary responses along the arena wall  
215 (E). High firing rates (Figure 6A-E, top row) generally corresponded to pre-trough timing (middle  
216 row, blues/pinks). Many conditional phase distributions (Figure 6A-E, bottom row, grayscale)  
217 show that precession halted once the cell precessed past theta trough; note that this  
218 nonlinearity means that some regression lines (Figure 5B) overestimate phase shifts. Positive  
219 phaser cells (Figure 6F-J) likewise revealed diverse spatial modulation, but the responses were  
220 more subtle, involving higher baseline firing rates (F-I, top row) and heterogeneous compositions  
221 of boundary-like and place-like selectivity. Positive phasemaps (Figure 6F+H-J, middle row)  
222 showed shifts from pre-theta-peak (greens) to post-theta-peak (blues) that were evident in  
223 shallow rate-phase regressions centered on zero phase (bottom row); recording 52 (G) was an  
224 oddball with procession centered on theta trough. To quantify spatial differences between  
225 negative and positive phasers, the widely-used Skaggs information measure (1993; Methods)  
226 corroborated that negative phaser spikes carried more spatial content (negative:  $n = 47$  unique  
227 cells;  $0.381 \pm 0.06$  bits/spike, mean  $\pm$  s.e.m.; positive:  $n = 24$ ,  $0.111 \pm 0.048$ ; *post hoc*  
228 log-transformed Welch's  $t = -3.92$ ,  $p = 0.0002$ ). This difference is consistent with our model  
229 (Figure 2A) where only the negative phasers are driven directly by spatial inputs. Thus biological

230 phaser cells, prominently in lateral septum, represent diverse spatiotemporal relationships

231 consistent with the phaser model.

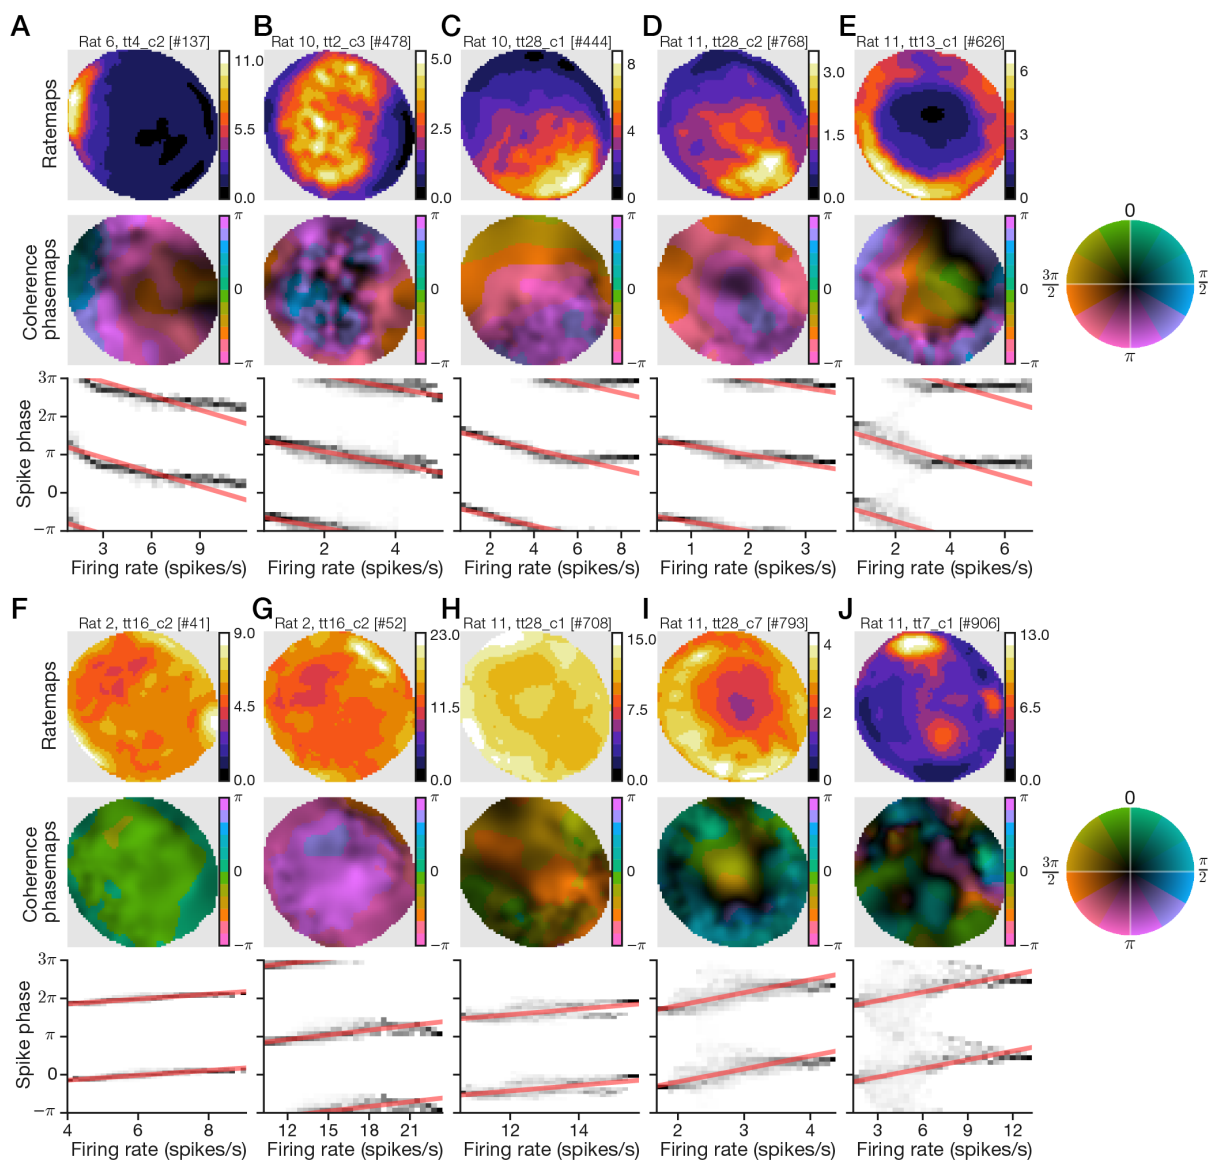

**Figure 6 | Example phaser recordings reveal diversity of spatial phase codes.** For 5 example recordings of negative (A-E) and positive (F-J) biological phasers, we show the ratemap (top), phase-coherence map (middle), and conditional phase distributions with rate-phase regression lines (bottom, like Figure 4H). Note that peak firing rates (A-J, top, colorbar axes) are consistent with the restricted range of biological phaser firing rates (Supplementary Figure 9). Negative phasers generally showed stronger spatial modulation and rate-phase correlations than positive phasers (Results).

**Table 1** Counts of theta cell recordings by brain area and phaser subtype.

| Area        | Negative  | Positive  | Nonphaser   |
|-------------|-----------|-----------|-------------|
| Septum      | 40 (7.4%) | 32 (5.9%) | 471 (86.7%) |
| Hippocampus | 4 (23.5%) | 1 (5.9%)  | 12 (70.6%)  |
| Thalamus    | 0 (0%)    | 0 (0%)    | 55 (100%)   |
| Midbrain    | 13 (3.9%) | 1 (0.3%)  | 320 (95.8%) |
| Other       | 8 (6.5%)  | 2 (1.6%)  | 114 (91.9%) |

232 Do biological phaser recordings reflect exclusively spatial inputs? To quantify contributions from  
233 trajectory-based factors, we computed spike information and modulation indexes for direction  
234 and speed (Methods). As a spatial baseline, regressing Skaggs information onto spatial phase  
235 information  $I_{\text{phase}}$  yielded slope 0.831 (Supplementary Figure 11A), indicating that spike phase  
236 contributes  $\sim 20.4\%$  to the information rate beyond spike position alone. In contrast, regressing  
237 the spike information content for direction or speed onto  $I_{\text{phase}}$  yielded 0.103 and 0.036,  
238 respectively (Supplementary Figure 11B+C), indicating minimal coding overlap between  $I_{\text{phase}}$   
239 and direction or speed. However, modulation indexes based on deflection of firing rates across  
240 direction ( $n = 101$  phaser recordings; median, 0.379) and speed (0.318) suggested dependence  
241 of phaser cell activity on the trajectory (Supplementary Figure 11D+E). Thus phaser firing rate,  
242 but not phase, may reflect spatial-behavioral confounds which must be resolved.

### 243 **Statistical model of spatial drive isolates inhomogeneous directionality**

244 The main behavioral confound is trajectory-biased sampling of cells whose directionality may  
245 vary by location. Spurious spatial activity may result from directionally biased visits to a  
246 particular location by the animal for which the recorded cell happened to have a similar  
247 directional preference. The problem is exacerbated by inhomogeneously directional cells that  
248 may exhibit a range of directional preferences across the environment. For example, a cell

249 responding to anti-clockwise movement during running may produce a boundary-like response  
250 along the wall if the animal only runs anti-clockwise along the wall. To evaluate this confound,  
251 we studied a Poisson-distributed generalized linear model (GLM) of spatial and trajectory  
252 variables. GLMs have been shown to learn independent spatial and directional contributions to  
253 firing that avoid trajectory-based biases (Acharya et al., 2016). We fit the GLM independently to  
254 every cell recording for each element of a  $3 \times 3$  spatial grid spanning the arena (Methods) to  
255 capture inhomogeneous changes in spatial or directional selectivity. The model is trained to  
256 predict spike counts across 300-ms intervals  $i$

$$\hat{Y}_i = \hat{\beta}_0 + \hat{\beta}_L L_i + \hat{\beta}_Q Q_i + \hat{\beta}_W W_i + \hat{\beta}_S S_i + \hat{\beta}_D D_i \quad (1)$$

257 where  $L$  and  $Q$  are linear and quadratic spatial variables,  $W$  is a sigmoidal wall-proximity signal,  
258  $S$  is linear speed, and  $D$  is movement direction.  $L$ ,  $Q$ , and  $W$  are purely spatial whereas  $S$  and  $D$   
259 capture the animal's velocity vector, so we call this the LQW-SD model. The spatial predictors  
260 are more reliable over the training intervals than the velocity predictors. To address this  
261 asymmetry, we trained LQW-SD on standardized predictors as a ridge regression with  
262  $\ell_2$ -regularization (Hastie et al., 2009). To maximally expose inhomogeneous directionality, we  
263 chose the regularization penalty that optimized the trade-off between maximizing the directional  
264 component of the model and minimizing the spike prediction error (Supplementary Figure 12;  
265 Methods). To quantify inhomogeneity, we computed a directional coherence index (DCI) on  $\{0, 1\}$   
266 measuring alignment of the 9  $\beta_D$  vectors across the grid; to quantify directionality, we computed  
267 a directional strength index (DSI) on  $\{0, 1\}$  measuring the magnitude of  $\beta_D$  relative to the other  
268 predictors (Methods). DCI for phasers ( $n = 69$  unique cells; median, 0.315) showed higher  
269 coherence than nonphasers ( $n = 631$ ; 0.213; *post hoc* Mann-Whitney  $U = 15,567$ ,  $p = 0.0001$ ).  
270 DSI for phasers (median, 0.0187) and nonphasers (0.0133) found similarly low directionality ( $U =$

271 18,258,  $p = 0.0277$ ) but nonphasers were more widely distributed (range, [0, 0.199]) than phasers  
272 ([0.002, 0.094]; Supplementary Figure 13). Biological phaser cells thus exclude both coherent  
273 (high DCI, high DSI) and inhomogeneous (low DCI, high DSI) directionality.

274 What does LQW-SD reveal about spatial predictors? Like DSI for directionality, we computed the  
275 relative strength of each model variable (equation (7); Methods). Box plots (Figure 7A) show the  
276 distribution of variable weights for phasers (green;  $n = 69$  unique cells) and nonphasers (gray;  
277  $n = 631$ ). Both cell types had similar central tendencies with nonphasers exhibiting wider ranges  
278 of variable strengths. Spatial factors overwhelm the wall and trajectory variables, such that  $L$   
279 and  $Q$  constitute approximately 30% and 60% of the model weight, respectively. Wall/boundary  
280 cells are (by observation) a small number within the dataset, but are the  $S$  and  $D$  factors really so  
281 low? We standardized predictors for training, but the trajectory-based signals may be highly  
282 non-normal. In that case, the importance of a model variable should be measured instead by its  
283 effective range of contribution to predictions. For each variable  $X$ , we computed its contribution

$$\max_i | \hat{\beta}_X X_i | \quad (2)$$

284 across time intervals  $i$  and sum-normalized the variables (Methods). The contribution profile  
285 (Figure 7B) was also dominated by  $L$  and  $Q$ , but  $W$ ,  $S$ , and  $D$  contributions were enhanced  
286 relative to the strength profile (Figure 7A). Wall and direction variables constituted approximately  
287 8% each of the total contribution and nonphasers revealed a wide range of speed contributions  
288 (Figure 7B,  $S$ , gray) consistent with extensive speed modulation in space-related brain areas  
289 (Fuhrmann et al., 2015; Kropff et al., 2015). Sorted matrixes of cell-level data confirmed this  
290 pattern and showed an inverse relationship between spatial and speed contributions



291 (Supplementary Figure 14). Thus LQW-SD revealed that spatial factors trade off with speed  
292 modulation in theta cells and that phasers were overwhelmingly spatial, not directional.

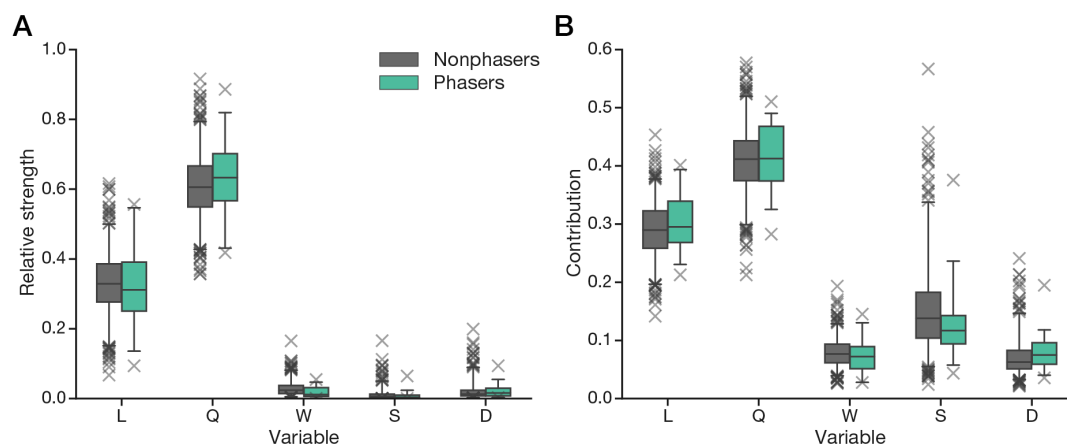

**Figure 7 | Phaser GLM predictions are driven by spatial predictors.** The GLM weights (A) and contributions (B) from the spatial ( $LQW$ ) and trajectory-based ( $SD$ ) variables for nonphasers ( $n = 631$  unique cells) and phasers ( $n = 69$ ) are shown in 95% box-and-whisker plots with outliers ( $\times$ ). For phasers, the second-order spatial predictors ( $L$  and  $Q$ ) are dominant.

293 Is LQW-SD accurate enough to reproduce spatial activity? The foregoing analysis is predicated  
294 on the model's ability to explain firing patterns. We used LQW-SD spike predictions across the  
295 training grid to reconstruct ratemaps (Methods). Quantifying accuracy as the vector cosine  
296 similarity between observed and predicted ratemaps, we found phasers ( $n = 69$  unique cells;  
297 median, 0.994) and nonphasers ( $n = 631$ ; 0.927) to have highly accurate reconstructions (*post*  
298 *hoc* Mann-Whitney  $U = 16,153$ ,  $p = 0.0004$ ). Observed and LQW-SD-predicted ratemaps are  
299 shown in Figure 8A-E for the example phasers in Figure 6A-E with overlaid arrows representing  
300 the modeled directionality ( $\beta_D$ ) of each grid section. To verify that LQW-SD also captured strong  
301 directional (high DSI) cells accurately, examples of coherent (high DCI) and inhomogeneous (low  
302 DCI) directionality are shown in Supplementary Figure 15. Thus LQW-SD provided a high-fidelity  
303 account of theta cell firing, including spatial and directional theta cells.



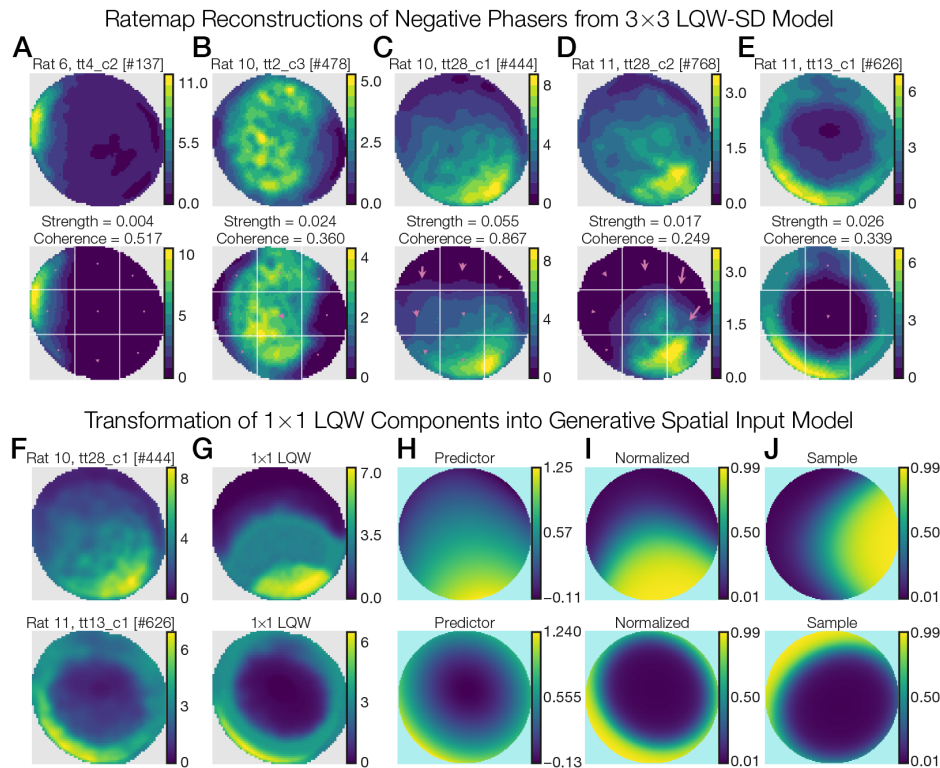

**Figure 8 | Phaser GLM reconstruction and transformation into generative spatial inputs.** (A-E) We show the observed ratemaps (top) and  $3 \times 3$  LQW-SD-predicted ratemaps (bottom) for the phaser examples in Figure 6A-E. Reconstructions were built from spike-count predictions in each grid section (Methods). White lines, model grid boundaries; arrows/dots, normalized GLM directional ( $D$ ) weights; Strength = DSI; Coherence = DCI. (F-J) The steps to form the generative spatial input model are illustrated (Methods). Phasers (F; examples from C and E) are trained in the  $1 \times 1$  LQW model (G), whose linear predictor (H) is normalized to  $\{0, 1\}$  with a sigmoid nonlinearity (I). To generate novel samples (J) from the normalized spatial functions, we added 20% Gaussian noise to the LQW parameters and randomly center-rotated the coordinate frame.

### 304 Competitive phase attractors for flexible spatial synchronization

305 Can phaser cells synchronize a downstream target to path-integration-like spatial phase codes?

306 We combined our model phasers (equation (3); Table 2; Table 3) with input from a reduced

307 LQW-SD model (equation (1)). The LQW model was trained on the full trajectory (that is, a  $1 \times 1$

308 grid) without trajectory variables  $S$  or  $D$ . The result is a seamless spatial model of biological

309 phaser cell input

$$F_{\text{LQW}}(x(t)) = \hat{\beta}_0 + \hat{\beta}_L L(x(t)) + \hat{\beta}_Q Q(x(t)) + \hat{\beta}_W W(x(t))$$

310 based on trajectory position over time  $x(t)$ . LQW training was optimized to wall signals  
311 (Supplementary Figure 12) to ensure the minority of boundary-like responses were captured. In  
312 our phaser model, spatial functions drive the negative phasers (Figure 2A). To create a  
313 generative spatial input model, we selected negative phaser recordings (such as Figure 8F+G)  
314 and computed the linear predictors (H), which we normalized to spatial functions on the range  
315  $\{0, 1\}$  (I). We generated novel samples  $F_{LQW}^*$  by randomly choosing a spatial function, fuzzing its  
316 parameters, and center-rotating the function by a random angle (Figure 8J; Methods). The  
317 ramping input (equation (4); Methods) to a model negative phaser thus follows

$$I_{\text{ramp}}(t) = g_e F_{LQW}^*(x(t))$$

318 with other parameters unchanged. We simulated 1,000  $F_{LQW}^*$  samples driving 1,000 model  
319 negative phasers connected (equation (5)) to 1,000 model positive phasers. The simulated  
320 phasers (see Supplementary Figures 16+17 for examples) showed a distribution of place-like,  
321 gradient-like, and boundary-like responses like the biological phasers but with rate-phase  
322 correlations from the model (Figure 1C). Thus model phasers derived from theta cell recordings  
323 can help simulate realistic spatial phase synchronization.

324 Do data-driven model phasers support multiplexed spatial synchronization? We first simulated  
325 the target burster neuron (equation (6); Table 4) on a 1-hr trajectory (Figure 4A, gray line) without  
326 any phaser input. The burst phasemap for this random walk (Figure 9A; peak coherence, 0.486)  
327 shows the modulation expected from averaging finite data on a fixed trajectory. We devised  
328 spatial phase codes that span both the environment and the theta cycle (Figure 9B) representing  
329 path integration along the 45° diagonal. With 2,000 possible phaser inputs, we increased WTA  
330 competition to yield 3.5% sparsity (Table 4). The competitively weighted average of joint

331 space-phase distributions (Figure 9C) shows the total phaser input, which reveals a blue band  
332 ( $\pi/2$  phase, top), due to positive phasers, alternating with a pink band ( $\pi$ , bottom), due to  
333 negative phasers. The spatial position of these bands (Figure 9C) tracked the corresponding  
334 phase strips in the desired phase codes, indicating that phaser diversity and competitive learning  
335 were sufficient to control the input distribution of burst phase across space. Does this phaser  
336 input entrain the target burster? With phaser input, the target burster phasemaps (Figure 9D;  
337 peak coherence, 0.994, top; 0.973, bottom) reveal highly coherent regions of synchronization to  
338 the positive (top) and negative (bottom) phasers that were sharply separated by a narrow band  
339 of phase incoherence (darkened area; Supplementary Movie 1). The two synchronization regions  
340 were expanded and shifted along the  $45^\circ$  diagonal relative to the input. Both effects are  
341 analogous to features of the 1D phase trajectories in Figure 3D+E: The expansion relates to the  
342 continuation (horizontally) of burst phase as position moved away from the fixed points; the shift  
343 relates to the phasic delay (vertically) between the fixed points and the onset of synchronized  
344 target bursting. Can a spectrum of spatial phase codes be learned simultaneously? We  
345 simulated 64 target bursters trained on phase codes with varying preferred directions. The same  
346 population of model phasers maintained control of the synchronization regions across preferred  
347 directions and spatial offsets (Supplementary Movies 2+3). Thus realistic phasers support  
348 functionally flexible but dynamically constrained synchronization to spatial phase codes.

349

## Discussion

350 We presented network and statistical models that outlined a novel mechanism for anchoring  
351 spatial representations in continuous regions of neural synchrony. Simulating the bursting

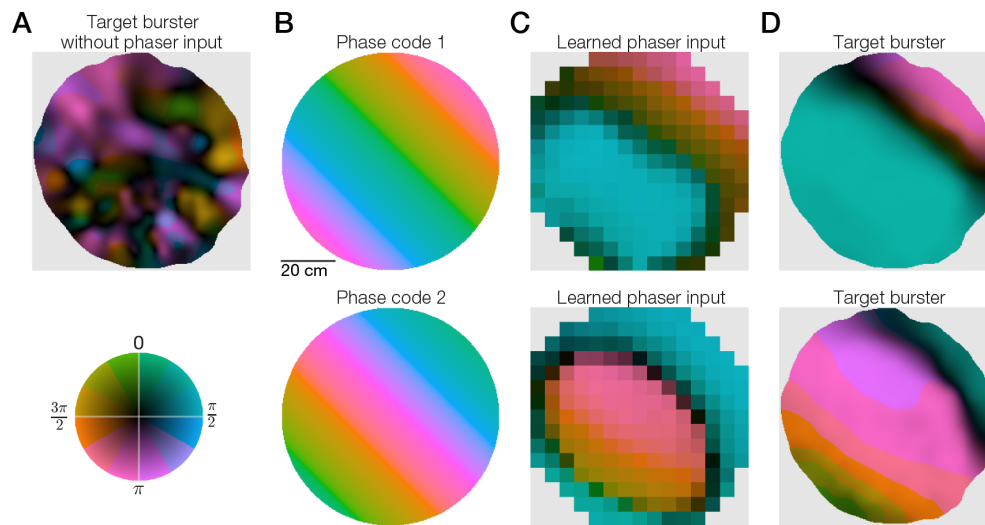

**Figure 9 | Phaser synchronization of reference points for path integration.** We simulated the noisy target burster and 1,000 negative and positive 2D phasers trained on path-integration-like phase codes. (A) Phase-coherence map of burst timing of the target burster without phaser input. Inset, phase-coherence color wheel. (B) For training, two spatial phase codes integrate along the 45° diagonal with different spatial offsets. (C) Phase-coherence maps of competitively-weighted phaser input. (D) Phase-coherence maps of burst timing of the target burster with phaser input. The broad blue/green (top) and pink (bottom) regions represent synchronization by the positive and negative phasers, respectively.

352 phaser model in 1D, we demonstrated that a simple connectivity motif between theta cells leads  
353 to negative and positive rate-phase correlations that can synchronize an artificial step-like phase  
354 code to distinct theta phases. We recorded theta cells from hippocampal and subcortical areas  
355 in exploring rats and found spatial responses, comprising strong negative (phase precessing)  
356 and weaker positive (phase processing) rate-phase correlations, with similar rate and timing  
357 dynamics as model phasers. A space-trajectory GLM trained on spike counts showed that  
358 trajectory dependence and potential behavioral biases were dominated by pure spatial factors in  
359 these cells. Finally, spatial GLM components founded a generative model of environmental  
360 inputs to simulate populations of 2D phasers. Sparse competitive weights produced a spectrum  
361 of synchronization regions for path-integration-like phase codes across preferred directions and  
362 spatial offsets.

### 363 **Relationship to hippocampal place-field theta-phase precession**

364 Phaser timing follows from the notion that stronger input, perhaps representing a sensory value,  
365 reduces latency to the next spike. The addition of an oscillating input forms peaks and valleys in  
366 time that control when spiking starts (for weak sensory drive above the threshold for silence) and  
367 how early the next spike can occur (for strong sensory drive below the threshold for nonstop  
368 firing). Mehta *et al* (2002) outlined this mechanism as a conceptual model for how information  
369 about position within a place field is encoded in the theta-phase precession of place cell firing  
370 (O'Keefe & Recce, 1993). In that theory, the sensory input comprises synaptic drive from the  
371 place cell network. That network input forms an asymmetric ramp-like input after learning and  
372 exploration (Mehta *et al.*, 1997, 2000), allowing place cells to monotonically precess across any  
373 traversal of the place field (Schmidt *et al.*, 2009). The additional plasticity, neuronal, and network  
374 effects supporting place-field phase precession may contribute to diverse functions including  
375 place field formation, spatial precision, and sequence learning for navigation and memory  
376 (O'Keefe & Recce, 1993; Skaggs *et al.*, 1996; Jensen & Lisman, 1996; Wallenstein & Hasselmo,  
377 1997; Levy *et al.*, 2005; Dragoi & Buzsáki, 2006; Feng *et al.*, 2015). The phaser model, however,  
378 is driven by a layer of sensory inputs represented as functions of space, without learning or  
379 network inputs. The phaser precesses/processes as the spatial input increases/decreases,  
380 creating an experience-independent temporal code that maps phase directly to an isocontour of  
381 its input function. This relative mechanistic and functional simplicity makes phasers  
382 parametrically robust and potentially prevalent in brain areas with oscillations and  
383 spatial/sensory inputs. This robustness allowed our models to be broadly tuned with few

384 parameters (Table 2; Table 3; Methods). Thus a simple mechanism may enable failsafe  
385 implementations of an important neurocomputation.

### 386 **Competitive burst synchronization as spatial phase reset**

387 Conversion between rate and phase codes may be an important neurocomputation for  
388 spatial/sensory feedback. The Mehta mechanism can yield highly correlated rate and phase,  
389 which raised the question whether temporal codes carry information distinct from firing rate. In  
390 place-field phase precession, there is evidence that phase and rate distinctly encode distance  
391 and speed (Huxter et al., 2003), which inspired the oscillatory interference theory whereby path  
392 integration is computed with a phase code (O'Keefe & Burgess, 2005; N. Burgess, 2008;  
393 Hasselmo, 2008). This theory described neural oscillators (VCOs) that integrate  
394 speed-modulated direction inputs with changes in phase, allowing conversion via neural  
395 synchrony into the firing-rate representations of grid and place cells (Blair et al., 2008, 2014).  
396 VCOs were originally conceived as dendritic oscillations, which allowed for simple reset  
397 mechanisms (N. Burgess, 2008; Hasselmo, 2008) but disallowed the necessary independence of  
398 multiple oscillators (Remme et al., 2010). While some theta cells in rats demonstrate the  
399 directional tuning of burst frequency necessary for VCOs (Welday et al., 2011), other species  
400 such as fruit bats have grid cells without continuous theta oscillations (Yartsev et al., 2011).  
401 Additionally, the critical theoretical problem for VCO codes is accumulating errors in self-motion  
402 inputs, including head-direction inputs that may not align with the animal's movement direction,  
403 and noise from biophysical variance in the oscillators. These errors lead to random drift of the  
404 spatial code within its reference frame or teleportation of the code to a different environment.

405 Proposed stabilizing mechanisms include network synchronization, ring attractors, oscillator  
406 redundancy, and/or coupling with continuous attractors in the grid cell network (Zilli & Hasselmo,  
407 2010; Hasselmo & Brandon, 2012; Bush & Burgess, 2014; C. P. Burgess & Burgess, 2014; Blair  
408 et al., 2014). Those models did not examine intrinsic neuronal bursting, as we do here, but it may  
409 also help stabilize phase-coding neurons by regulating burst frequency via resonance (Lisman,  
410 1997; Izhikevich, 2007) and reducing the impact of intra-burst spike-count or spike-interval  
411 variance on the phase code.

412 Stabilization alone does not address how environmental cues reset or calibrate the phase code  
413 within an absolute spatial reference frame. Simple phase models of hippocampal remapping  
414 demonstrated that regular calibration from sensory cues eliminates phase drift over long  
415 timescales (Monaco et al., 2011). The phaser mechanism that we study here is a rate-to-phase  
416 conversion that may provide the synchronous feedback signal needed for that calibration.

417 Phasers take direct spatial inputs that modulate rate and phase together such that rate controls  
418 feedback gain (to downstream targets) and burst phase indicates the input-mapped phase  
419 target. This mechanism does not require continuous theta oscillations: Transient bouts of theta  
420 would propagate brief synchronizing bursts. The intrinsic bursting dynamics (equation (3);  
421 Izhikevich, 2007) reproduced some characteristics of parahippocampal theta cells such as  
422 skipping or alternating theta cycles (Deshmukh et al., 2010; Brandon et al., 2013). With  
423 competitive weights, phasers were able to collectively synchronize a noisy theta-bursting neuron  
424 to both 1D (Figure 3) and 2D (Figure 9) spatial phase codes. These simulations demonstrated  
425 that weak clock signals (that is, phasers with intra-burst spike variance and cycle skipping) can  
426 collectively counteract accumulated phase errors in a neuronal oscillator (cf. Rossant et al.,

427 2011). The role of bursts in facilitating interareal transmission and synaptic plasticity (Lisman,  
428 1997; Csicsvari et al., 1998) suggests bursting could be critical to an experience-dependent  
429 feedback loop. Thus the calibration of the spatial metric may depend on burst  
430 phase-synchronization intermediating rate-based representations.

### 431 **A conversation between calibration and integration**

432 Our phaser simulations present two hypothetical populations (negative, positive) with a minimal  
433 connectivity scheme (Figure 2A). This modeling choice restricted the granularity of phase  
434 fixed-points that could be synchronized: More complex connectivity patterns may increase the  
435 diversity of preferred phases available for spatial synchronization. In the model,  
436 negative/positive phasers demonstrated a pattern of strong/weak rate-phase correlations and  
437 trough/peak theta preference (Figure 1C). Extracellular recording precluded subthreshold  
438 evidence for the mechanism, but the dynamics of identified biological phaser cells corroborated  
439 this model phaser pattern (Figure 5). The GLM model of biological phaser firing further  
440 corroborated phasers' nondirectionality or directional isotropy, which is a general requirement  
441 for stable path integration systems (Issa & Zhang, 2012). Thus biological phasers might support  
442 broadly, not finely, tuned spatial phase attractors (cf. Supplementary Movie 1).

443 How can broadly-tuned calibration support finely-tuned integration? One possibility is that  
444 calibration is selectively activated after learning. Learning requires synchrony with phasers, but  
445 the burst frequency of VCOs increases with movement along the preferred direction (N. Burgess,  
446 2008; Welday et al., 2011). The subset of VCOs with preferred directions orthogonal to the  
447 animal's movement direction will phase synchronize with the shared theta rhythm and,



448 correspondingly, the phaser population. Thus the orthogonal subset will optimize competitive  
449 learning for phasers over repeated theta cycles in the same location; this subset evolves as the  
450 animal explores the environment. Calibration in the familiar environment likewise requires  
451 synchrony with phasers, but it must be interdigitated with path integration (Monaco et al., 2011)  
452 perhaps mediated by discrete attentive behaviors during pauses in locomotion such as head  
453 scanning (Monaco et al., 2014). Without this interplay, the spatial precision of the phase code  
454 would be bounded by the broad tuning of the phase attractor. Ring attractor organization of  
455 VCOs (Blair et al., 2014; C. P. Burgess & Burgess, 2014) could have particular benefits during  
456 initial learning and online calibration: Respectively, to ensure the existence of an orthogonal  
457 subset for any movement direction, and to propagate the calibrated phase throughout the path  
458 integrator network via intrinsic connectivity. Selective switching between calibration and  
459 integration could be driven by accumulating error or mismatch signals, possibly mediated by  
460 grid cells (Blair et al., 2014; Rennó-Costa & Tort, 2017). Further studies should characterize how  
461 this phase code “conversation” might support the brain’s spatial metric.

#### 462 **Hippocampo-septo-entorhinal feedback loop for the spatial metric**

463 Biological phasers were found in hippocampus and lateral septum, but not thalamic sites.  
464 Lateral septum, with the bulk of the recording data (Table 1), is interconnected with hippocampal  
465 CA1/CA3 and pacemaker networks of the medial septum (Jakab & Leranath, 1995). These cells  
466 are well-placed to combine theta oscillations and spatial inputs (Takamura et al., 2006), as  
467 required for the phaser mechanism, and to participate in subcortical theta-rhythmic feedback  
468 and regulatory circuits (Leranath et al., 1999; Luo et al., 2011; Sartor & Aston-Jones, 2012; Ruan

469 et al., 2017). The spatial representations of biological phasers included small place-like fields,  
470 broad linear gradients, and border/border-place responses. This spatial variance could be driven  
471 by diverse inputs and connectivity patterns including single or multiple place cells, object-place  
472 cells (Deshmukh & Knierim, 2011; Tsao et al., 2013), or border cells (Lever et al., 2009; Savelli et  
473 al., 2008; Solstad et al., 2008). While our data-driven simulations of 2D phasers showed  
474 constrained spatial tuning (as discussed above), training with VCO-like phase codes flexibly  
475 produced border-aligned regions of phase synchronization across preferred directions (for  
476 example, Figure 9D, top, pink). If path integration is calibrated by a phaser mechanism, then  
477 these learned regions could contribute to the role of border visits in correcting (or distorting) the  
478 spatial metric carried by grid cells (Hardcastle et al., 2015; Stensola et al., 2015). Thus robust  
479 temporal neurocomputations may help anchor neural spatial maps to the outside world.

480

## Materials and methods

481 **Bursting models.** We define a quadratic integrate-and-fire model (Izhikevich, 2003) of  
482 intrinsic bursting with a fast variable for the spiking limit cycle ( $V$ ) and a slow adaptive variable  
483 for terminating bursts ( $u$ ). The dynamics follow

$$\tau \dot{V} = \Phi(V) - u + I(t) \quad (3)$$

$$\tau \dot{u} = a(bV - u)$$

484 where  $I(t)$  is a cell-specific time-varying input,  $\Phi(V) = 0.04V^2 + 5V + 140$  is a quadratic  
485 nonlinearity for spike initiation,  $a$  and  $b$  control adaptive feedback, and  $\tau$  sets a shared  
486 time-scale for spiking and bursting (in addition to the time constants implicit in  $\Phi(V)$  and  $a$ ).  
487 Whenever  $V > V_t$ , a spike is recorded,  $V$  is reset to  $c$ , and  $u$  is incremented by  $d$ . Bursting  
488 parameters are listed in Table 2. While  $V$  is approximately millivolt scale, we treat this system as  
489 a qualitative, not biophysical, model for which the parameters are in arbitrary units.

490 For negative phasers, we set the time-varying input (equation (3)) to the combination

$$I(t) = I_\theta(t) + I_{\text{ramp}}(t)$$

491 of sinusoidal theta inhibition (for inhibitory gain  $g_\theta < 0$ )

$$I_\theta(t) = g_\theta [0.5 (\cos(2\pi f_\theta t) + 1)]$$

492 and direct ramping excitation (for excitatory gain  $g_e$ )

$$I_{\text{ramp}}(t) = g_e F_{\text{ramp}}(t) \quad (4)$$

493 where the ramping input function  $F_{\text{ramp}}(t)$  has range  $\{0, 1\}$ .

494 The positive phasers have theta gain  $g_\theta > 0$  and follow equation (3) with negative-phaser input

$$I(t) = I_{\text{neg}} = -g_{\text{inh}}(V - E_{\text{inh}}) \quad (5)$$

495 where  $g_{\text{inh}}$  is a slow inhibitory conductance

$$\tau_{\text{inh}} \dot{g}_{\text{inh}} = -g_{\text{inh}}$$

496 that is incremented by  $d_{\text{inh}}$  with every pre-synaptic spike (Table 3).

497 The target bursters have a shorter time-constant ( $\downarrow \tau$ ) and lower burst excitability ( $\uparrow d$ ; Table 2). In

498 place of equation (3), the fast variable follows

$$\tau \frac{dV}{dt} = \Phi(V) - u + I_{\text{syn}}(t) + I_{\text{const}} + \sigma \xi \frac{\tau}{\sqrt{dt}} \quad (6)$$

499 where normalized white noise  $\xi$  is controlled by gain  $\sigma$ , and  $I_{\text{syn}}(t)$  is total synaptic drive from the

500 phaser network

$$I_{\text{syn}}(t) = \sum_{k \in \{\text{neg, pos}\}} \left[ g_k \sum_{j=1}^{128} W_k^j \delta(t - t_k^j) \right]$$

501 where  $g_{\text{neg}}/g_{\text{pos}}$  are subtype-specific feedback gains (Table 4),  $W_{\text{neg}}/W_{\text{pos}}$  are the phaser weight

502 vectors (for example, Figure 3B), and  $t_{\text{neg}}/t_{\text{pos}}$  are most-recent-spike vectors. Constant input

503 current was tuned ( $I_{\text{const}}$ , Table 4) so that the intrinsic burst rate, without noise or synaptic input,

504 was close to reference theta frequency ( $7.519 \text{ s}^{-1}$  compared to  $f_\theta = 7.5 \text{ s}^{-1}$ ).

**Table 2** Izhikevich parameters for theta-bursting neuron models.

| <b>Model</b>         | $a$  | $b$ | $c$   | $d$ | $V_t$ | $\tau$ |
|----------------------|------|-----|-------|-----|-------|--------|
| Phaser model         | 0.02 | 0.2 | -50.0 | 4.0 | 30.0  | 7.0 ms |
| Target burster model | 0.02 | 0.2 | -50.0 | 5.0 | 30.0  | 3.0 ms |

**Table 3** Input and conductance parameters for the phaser models.

| <b>Subtype</b> | $g_e$ | $g_\theta$ | $d_{inh}$ | $E_{inh}$  | $\tau_{inh}$ |
|----------------|-------|------------|-----------|------------|--------------|
| Negative       | 21.0  | -5.0       | -         | -          | -            |
| Positive       | -     | 25.0       | 3.0       | -80.0 (mV) | 100 ms       |

**Table 4** Parameters for the intrinsic theta-bursting neuron used as a synchronization target. WTA values show the percent and number of competitive synapses selected in each model.

| <b>Target model</b> | $I_{const}$ | $g_{neg}$ | $g_{pos}$ | $\sigma$ | WTA             |
|---------------------|-------------|-----------|-----------|----------|-----------------|
| Target burster (1D) | 12.65       | 1.0       | 2.0       | 0.3      | 20% (50/256)    |
| Target burster (2D) | 12.65       | 10.0      | 5.0       | 0.3      | 3.5% (70/2,000) |

505 **Spiking simulations.** Spiking neuron and network models were implemented in the  
506 equation-based Brian simulator (Goodman & Brette, 2008). Simulations were integrated in 1-ms  
507 timesteps. Phaser layers and the target burster without noise were evolved with Runge-Kutta  
508 4th-order integration; the target burster with noise used the forward Euler method. Burst timing  
509 in simulations was determined as spike times following interspike intervals  $\geq 25$  ms.

510 For 1D spatial simulations, local tuning functions were Gaussian functions with bandwidth 1/64  
511 normalized to  $\{0, 1\}$  and centered at 64 evenly-spaced positions from 0 to 1. Each long-range  
512 tuning function was 1 minus a local tuning function. The gain of phaser input onto the target  
513 burster (Table 4) was manually tuned for visually matched ‘middle of the road’ synchronization at  
514 both fixed points.

515 For 2D spatial simulations, phase-code target gratings had spatial period 80 cm so that one  
516 cycle covered the environment. Phaser gain onto the target burster (Table 4) was manually tuned  
517 to roughly equalize the size of negative and positive synchronization modes across different  
518 reference phases.

519 **Competitive learning.** Based on 1-hr training simulations, we generated joint space-phase  
520 distributions from phaser spikes:  $15 \times 36 (x, \phi)$  bins for 1D simulations;  $15 \times 15 \times 36 (x, y, \phi)$   
521 bins for 2D simulations. The phase-code target was either directly specified as a binary array for  
522 1D simulations or binned from a spatial grating function for 2D simulations. We computed the  
523 vector cosine similarity between the phaser distributions and the target as the basis for the  
524 phaser synaptic weights. To determine competitive weights, we chose the WTA% negative and

525 WTA% positive phasers (Table 4) with the highest similarities and normalized those similarities to  
526  $\{0, 1\}$  via  $[(\text{similarity} - \text{min}) / (\text{max} - \text{min})]$ . Unselected weights were set to 0. Weighted-average  
527 phaser inputs (Figure 3C; Figure 9C) were computed as the product-sum of the weight vector  
528 with an array of all space-phase distributions.

529 **Subjects and surgery.** Male Long-Evans rats (350–400 g) were individually housed and  
530 kept at 85% of *ad libitum* weight. They were trained over 5 d to forage for food pellets in an  
531 enclosed environment. Under deep isoflurane anesthesia, rats were chronically implanted with  
532 tetrode arrays targeting (across rats) the septum, dorsal hippocampus, anterior thalamus,  
533 midbrain, and/or other subcortical areas. Each rat was implanted with 16 tetrodes (64 electrode  
534 channels) that were grouped into four independently drivable bundles of four tetrodes each. All  
535 experiments were conducted in accordance with the U.S. National Institute of Health Guide for  
536 the Care and Use of Laboratory Animals (NIH Publications No. 80–23), and were approved in  
537 advance by the animal subjects review committee at the University of California, Los Angeles.

538 **Theta cell recordings.** Data collection methods including conduct of recording sessions,  
539 video tracking analysis, and single-unit acquisition have been described previously (Welday et  
540 al., 2011). The phase of the septohippocampal theta oscillation was quantified from the LFP  
541 signal on a reference electrode in the hippocampal fissure. In one subject (rat 11), a strong theta  
542 cell was used as phase reference instead of the LFP signal and was not otherwise included in  
543 data analysis. All data for analysis was filtered for linear movement speeds  $>5$  cm/s.

544     **Adaptive spatial maps.** To handle large variance in spatial data density from long  
545 recordings, we computed spatial maps with adaptive scaling kernels. We used a KD-tree  
546 algorithm to generate a nearest-neighbor model of the data points for the map. For every pixel  
547 to evaluate, we found the enclosing radius of the nearest 4% of data points. If the radius was  
548  $<8\%$  or  $>30\%$  of the arena diameter, then it was fixed at 8% or 30%, respectively. A Gaussian  
549 kernel set weights for each data point in this evaluation radius. For ratemaps, we computed  
550 weighted averages of trajectory data and spike data to create occupancy and spike density  
551 maps; dividing the spike density by the occupancy map produced the ratemap. For phasemaps,  
552 we computed weighted mean resultant vectors from which we retrieved the phase average and  
553 variance; the phase average was used for phase-only maps and the variance was normalized  
554 into a coherence mask for the phase-coherence maps.

555     **Theta-rhythmic analysis.** The rhythmicity index and burst-frequency estimates were  
556 derived from spike-timing autocorrelations. We adaptively smoothed 128-bin 0.5-s correlograms  
557 to find stable estimates of the first trough and first (non-central) peak of the correlograms.  
558 Rhythmicity was calculated as the ratio  $[(\text{peak} - \text{trough}) / \text{peak}]$ . Burst-frequency was  
559 calculated as the average of the first-peak mode estimate and an estimate based on a  
560 weighted-average of the first-to-second-trough correlations.

561 The theta modulation index was computed from a  $10^\circ$  binned phase histogram on  $\{-\pi, \pi\}$ . We  
562 circularly convolved the histogram with a  $10^\circ$  bandwidth Gaussian kernel for smoothing. Theta  
563 modulation was calculated as the ratio  $[(\text{max} - \text{min}) / \text{max}]$  of the smoothed histogram.



564 **Rate-phase regressions.** We implemented the method of Kempter *et al* (2012) for  
565 computing circular-linear regressions with stable estimates of the correlation coefficient and  
566  $p$ -value. Unreported  $p$ -values were arbitrarily close to 0. This method was used for all rate-phase  
567 regression lines and correlation values. To compute total phase shift, we multiplied the  
568 rate-phase regression slope by the width of the range of firing rates in the ratemap.

569 **Information-theoretic measures.** We computed spatial phase information  $I_{\text{phase}}$  as the  
570 mutual information between phase ( $\phi$ ) and position ( $x$ )

$$I(\phi; x) = \sum_x \sum_{\phi} p(\phi, x) \log_2 \left( \frac{p(\phi, x)}{p(\phi) p(x)} \right)$$

571 based on joint space-phase distributions of spikes binned into  $15 \times 15 \times 36$  ( $x, y, \phi$ ) arrays. This  
572 measure yields information in units of bits. We permuted spike phases 1,000 times to calculate  
573  $p$ -values.

574 We computed spike information measures based on Skaggs' (1993) formulation

$$I_K = \frac{1}{F} \sum_{k \in K} p(k) f(k) \log_2 \left( \frac{f(k)}{F} \right)$$

575 where  $K$  is position, direction, or speed of the trajectory;  $p$  is the occupancy density;  $f$  is a  
576 firing-rate function; and  $F$  is the mean firing rate. Position was binned into  $15 \times 15$  arrays on  
577  $\{0, 80\}$  cm along the  $x$  and  $y$  axes; direction into 36 bins on  $\{0, 2\pi\}$ ; and speed into 18 bins on  
578  $\{5, 50\}$  cm/s excluding bins with  $<3$  s occupancy. These measures yield information rates in  
579 units of bits/spike. We randomly shifted-and-wrapped spike trains with 20 s minimum offsets  
580 and reinterpolated trajectory data 1,000 times to calculate  $p$ -values.

581 **Movement modulation.** The direction modulation index was computed as the ratio [(max  
582 – min) / max] of a smoothed firing-rate function of movement direction. Average firing rates in  
583 36 direction bins on  $\{0, 2\pi\}$  were circularly convolved with a  $10^\circ$  bandwidth Gaussian kernel. The  
584 speed modulation index was computed as the ratio [(max – min) / max] of a firing-rate function  
585 of speed. Average firing rates were calculated for 14 bins on  $\{5, 40\}$  cm/s excluding bins with  $<8$   
586 s occupancy.

587 **GLM training.** Ridge regression models were trained on 9 scalar predictors representing  
588 the vector components of the 5 model variables:  $L = (x, y)$ ,  $Q = (x^2, y^2, xy)$ ,  $W$  (scalar),  $S$  (scalar),  
589 and  $D = (u_x, u_y)$ . The wall predictor  $W$  was a sigmoid proximity signal  $[1/(1 + \exp(-k(r - w_0)))]$   
590 for radius  $r$  from arena center,  $k = 0.5$ , and  $w_0 = 30$  cm.  $S$  was linear trajectory speed.  $D$  was the  
591 unit vector along the movement direction. Training samples were 300-ms bins and predictors  
592 were interpolated at the midpoint of each bin. Each predictor was standardized by subtracting  
593 its sample mean and dividing by its sample standard deviation. The response variable was the  
594 log spike-count  $Y$  for each bin, which makes this a Poisson-distributed GLM. The trajectory was  
595 divided into equal-sized  $2 \times 2$  or  $3 \times 3$  grids based on data limits. For each grid section, the  
596 GLM was trained on all samples inside the section based on the interpolated  $(x, y)$  position.  
597 Estimated model intercepts and coefficients for each recording and grid section were stored for  
598 analysis (or for the reduced LQW generative model). To regularize the model, tuning parameter  $\alpha$   
599 determined the  $\ell_2$ -norm penalty for least-squares optimization

$$\hat{\beta} = \arg \min_{\beta} \left[ \sum_{i=1}^{n_t} (Y_i - \hat{Y}_i)^2 + \alpha \|\beta\|_2^2 \right]$$

600 where  $n_t$  was the number of training samples. We maximized model directionality (or, similarly,  
601 the boundary response  $W$  for the LQW generative model) by choosing

$$\hat{\alpha} = \arg \max_{\alpha} \left[ \frac{1}{n_r} \sum_{k=1}^{n_r} \frac{e^{\|\beta_{D,k}\|_2} \cdot n_{t,k}}{\sum_{j \in \{LQWSD\}} e^{\|\beta_{j,k}\|_2} \sum_i (K_{i,k} - \hat{K}_{i,k})^2} \right]$$

602 which maximizes (over  $n_r = 1,073$  theta-cell recordings) the softmax directional coefficients

603 while minimizing mean squared error (MSE) of spike-count ( $K = \exp(Y)$ ) predictions

604 (Supplementary Figure 12). The value  $\alpha = 1.2496$  from the  $2 \times 2$  model was used for analysis

605 because of higher likelihood, lower MSE, lower penalty, and complete wall contact across grid

606 sections compared to the  $3 \times 3$  model.

607 **GLM analysis.** The relative strengths of GLM variables were computed as normalized

608 vector norms

$$\text{Strength}(X) = \frac{\sum_{i=1}^g \|\beta_X^i\|_2^2}{\sum_{j \in \{LQWSD\}} \sum_{i=1}^g \|\beta_j^i\|_2^2} \quad (7)$$

609 for variable  $X \in \{L, Q, W, S, D\}$  across  $g$  grid sections. Thus DSI was computed as  $\text{Strength}(D)$

610 and DCI was computed as 1 minus the normalized circular standard deviation of the  $\beta_D$  vector

611 angles across the grid. We computed variable contributions similarly to equation (7) but with

612 maximum linear predictors (equation (2)) instead of coefficient vector norms. The sum across

613 variables for both relative strength and contribution was normalized within recordings and then

614 averaged by unique cell (Figure 7). Grid matrix plots (Supplementary Figure 14A+C) show these

615 values without the grid summations (equation (7)).

616 To reconstruct ratemaps, we used the midpoints of grid-specific training samples to predict  
617 spike counts from the model for each grid section. We collated the counts and sample positions  
618 across grid sections to reconstitute a complete dataset for generating the ratemap.

619 To create the LQW generative model, we used a COBYLA search to find the arena-bounded  
620 minimum and maximum of the linear predictor for each recording. We normalized the LQW  
621 parameters to  $\{0, 1\}$  and applied a clipping sigmoid  $[1/(1 + \exp(-10(f - 0.5)))]$  to smoothly  
622 enforce the range of the resulting spatial function. To sample the generative model, we randomly  
623 selected a negative phaser's spatial function, added 20% Gaussian noise to its LQW  
624 parameters, and rotated the function about the center by a random angle.

625 **Software** Modeling and analysis was performed using a custom python package that  
626 depends on the open source ecosystem: numpy, scipy, matplotlib, seaborn, pandas, scikit-learn,  
627 pytables, Brian2, and other libraries. The source code and a complete specification of the  
628 python environment is available at <https://doi.org/10.6084/m9.figshare.5552467>.

629

## End notes

630       **Acknowledgments** This work was supported by the CRCNS grant NIH R01MH079511 to  
631 K.Z., H.T.B., and J. J. Knierim. A Johns Hopkins University Science of Learning Institute award  
632 supported J.D.M. during the writing of the paper.

633       **Author Contributions** J.D.M. analyzed data, developed models, performed simulations,  
634 and wrote the paper. H.T.B. conducted experiments and collected data. H.T.B. and K.Z.  
635 conceived the idea for the project and provided scientific guidance. K.Z. provided mathematical  
636 guidance. All authors read and commented on revisions of the manuscript.

## References

- Acharya, L., Aghajan, Z. M., Vuong, C., Moore, J. J., & Mehta, M. R. (2016). Causal influence of visual cues on hippocampal directional selectivity. *Cell*, *164*(1-2), 197-207. doi: 10.1016/j.cell.2015.12.015
- Amini, B., Clark, J. W., Jr, & Canavier, C. C. (1999). Calcium dynamics underlying pacemaker-like and burst firing oscillations in midbrain dopaminergic neurons: a computational study. *J Neurophysiol*, *82*(5), 2249-61.
- Blair, H. T., Gupta, K., & Zhang, K. (2008). Conversion of a phase- to a rate-coded position signal by a three-stage model of theta cells, grid cells, and place cells. *Hippocampus*, *18*(12), 1239-55. doi: 10.1002/hipo.20509
- Blair, H. T., Wu, A., & Cong, J. (2014). Oscillatory neurocomputing with ring attractors: a network architecture for mapping locations in space onto patterns of neural synchrony. *Philos Trans R Soc Lond B Biol Sci*, *369*(1635), 20120526. doi: 10.1098/rstb.2012.0526
- Brandon, M. P., Bogaard, A. R., Schultheiss, N. W., & Hasselmo, M. E. (2013). Segregation of cortical head direction cell assemblies on alternating  $\theta$  cycles. *Nat Neurosci*, *16*(6), 739-48. doi: 10.1038/nn.3383
- Brette, R. (2015). Philosophy of the spike: Rate-based vs. spike-based theories of the brain. *Front Syst Neurosci*, *9*, 151. doi: 10.3389/fnsys.2015.00151
- Burak, Y., & Fiete, I. R. (2009). Accurate path integration in continuous attractor network models of grid cells. *PLoS Comput Biol*, *5*(2), e1000291. doi: 10.1371/journal.pcbi.1000291
- Burgess, C. P., & Burgess, N. (2014). Controlling phase noise in oscillatory interference models of grid cell firing. *J Neurosci*, *34*(18), 6224-6232. doi: 10.1523/JNEUROSCI.2540-12.2014
- Burgess, N. (2008). Grid cells and theta as oscillatory interference: theory and predictions. *Hippocampus*, *18*(12), 1157-74. doi: 10.1002/hipo.20518
- Bush, D., & Burgess, N. (2014). A hybrid oscillatory interference/continuous attractor network model of grid cell firing. *J Neurosci*, *34*(14), 5065-79. doi: 10.1523/JNEUROSCI.4017-13.2014
- Buzsáki, G., Grastyán, E., Tveritskaya, I. N., & Czopf, J. (1979). Hippocampal evoked potentials and eeg changes during classical conditioning in the rat. *Electroencephalogr Clin Neurophysiol*, *47*(1), 64-74.

- Carpenter, F., Manson, D., Jeffery, K., Burgess, N., & Barry, C. (2015). Grid cells form a global representation of connected environments. *Curr Biol*, *25*(9), 1176–82. doi: 10.1016/j.cub.2015.02.037
- Csicsvari, J., Hirase, H., Czurko, A., & Buzsáki, G. (1998). Reliability and state dependence of pyramidal cell-interneuron synapses in the hippocampus: an ensemble approach in the behaving rat. *Neuron*, *21*(1), 179–189.
- Deshmukh, S. S., & Knierim, J. J. (2011). Representation of non-spatial and spatial information in the lateral entorhinal cortex. *Front Behav Neurosci*, *5*, 69. doi: 10.3389/fnbeh.2011.00069
- Deshmukh, S. S., Yoganarasimha, D., Voicu, H., & Knierim, J. J. (2010). Theta modulation in the medial and the lateral entorhinal cortices. *J Neurophysiol*, *104*(2), 994–1006.
- Dragoi, G., & Buzsáki, G. (2006). Temporal encoding of place sequences by hippocampal cell assemblies. *Neuron*, *50*(1), 145–157.
- Etienne, A. S., Maurer, R., Boulens, V., Levy, A., & Rowe, T. (2004). Resetting the path integrator: a basic condition for route-based navigation. *J Exp Biol*, *207*(9), 1491–1508.
- Feng, T., Silva, D., & Foster, D. J. (2015). Dissociation between the experience-dependent development of hippocampal theta sequences and single-trial phase precession. *J Neurosci*, *35*(12), 4890–902. doi: 10.1523/JNEUROSCI.2614-14.2015
- Fuhrmann, F., Justus, D., Sosulina, L., Kaneko, H., Beutel, T., Friedrichs, D., ... Remy, S. (2015). Locomotion, theta oscillations, and the speed-correlated firing of hippocampal neurons are controlled by a medial septal glutamatergic circuit. *Neuron*, *86*, 1–12. doi: 10.1016/j.neuron.2015.05.001
- Fuhs, M. C., & Touretzky, D. S. (2006). A spin glass model of path integration in rat medial entorhinal cortex. *J Neurosci*, *26*(16), 4266–4276.
- Goodman, D., & Brette, R. (2008). Brian: a simulator for spiking neural networks in python. *Front Neuroinform*, *2*, 5. doi: 10.3389/neuro.11.005.2008
- Gothard, K. M., Skaggs, W. E., & McNaughton, B. L. (1996). Dynamics of mismatch correction in the hippocampal ensemble code for space: interaction between path integration and environmental cues. *J Neurosci*, *16*(24), 8027–40.
- Hardcastle, K., Ganguli, S., & Giocomo, L. M. (2015). Environmental boundaries as an error correction mechanism for grid cells. *Neuron*, *86*(3), 827–39. doi: 10.1016/j.neuron.2015.03.039

- Hasselmo, M. E. (2008). Grid cell mechanisms and function: contributions of entorhinal persistent spiking and phase resetting. *Hippocampus*, 18(12), 1213–29. doi: 10.1002/hipo.20512
- Hasselmo, M. E., & Brandon, M. P. (2012). A model combining oscillations and attractor dynamics for generation of grid cell firing. *Front Neural Circuits*, 6, 30. doi: 10.3389/fncir.2012.00030
- Hastie, T., Tibshirani, R., & Friedman, J. (2009). *The elements of statistical learning: Data mining, inference, and prediction*. Springer-Verlag.
- Huxter, J., Burgess, N., & O’Keefe, J. (2003). Independent rate and temporal coding in hippocampal pyramidal cells. *Nature*, 425(6960), 828–32. doi: 10.1038/nature02058
- Issa, J. B., & Zhang, K. (2012). Universal conditions for exact path integration in neural systems. *Proc Natl Acad Sci U S A*, 109(17), 6716–20. doi: 10.1073/pnas.1119880109
- Izhikevich, E. M. (2003). Simple model of spiking neurons. *IEEE Trans Neural Netw*, 14(6), 1569–72. doi: 10.1109/TNN.2003.820440
- Izhikevich, E. M. (2007). *Dynamical systems in neuroscience*. MIT press.
- Jakab, R. L., & Leranath, C. (1995). Septum. In G. Paxinos (Ed.), (pp. 405–442). San Diego: Academic Press.
- Jensen, O., & Lisman, J. E. (1996). Hippocampal ca3 region predicts memory sequences: accounting for the phase precession of place cells. *Learn Mem*, 3(2-3), 279–87.
- Kempster, R., Leibold, C., Buzsáki, G., Diba, K., & Schmidt, R. (2012). Quantifying circular-linear associations: hippocampal phase precession. *J Neurosci Methods*, 207(1), 113–24. doi: 10.1016/j.jneumeth.2012.03.007
- Knierim, J. J., Kudrimoti, H. S., & McNaughton, B. L. (1998). Interactions between idiothetic cues and external landmarks in the control of place cells and head direction cells. *J Neurophysiol*, 80(1), 425–446.
- Kropff, E., Carmichael, J. E., Moser, M.-B., & Moser, E. I. (2015). Speed cells in the medial entorhinal cortex. *Nature*, [Epub ahead of print]. doi: 10.1038/nature14622
- Krupic, J., Bauza, M., Burton, S., Barry, C., & O’Keefe, J. (2015). Grid cell symmetry is shaped by environmental geometry. *Nature*, 518(7538), 232–5. doi: 10.1038/nature14153



- Langston, R. F., Ainge, J. A., Couey, J. J., Canto, C. B., Bjerknes, T. L., Witter, M. P., ... Moser, M.-B. (2010). Development of the spatial representation system in the rat. *Science*, *328*(5985), 1576–80. doi: 10.1126/science.1188210
- Leranth, C., Carpi, D., Buzsaki, G., & Kiss, J. (1999). The entorhino-septo-supramammillary nucleus connection in the rat: morphological basis of a feedback mechanism regulating hippocampal theta rhythm. *Neuroscience*, *88*(3), 701–18.
- Lever, C., Burton, S., Jeewajee, A., O’Keefe, J., & Burgess, N. (2009). Boundary vector cells in the subiculum of the hippocampal formation. *J Neurosci*, *29*(31), 9771–7. doi: 10.1523/JNEUROSCI.1319-09.2009
- Levy, W. B., Hocking, A. B., & Wu, X. (2005). Interpreting hippocampal function as recoding and forecasting. *Neural Netw*, *18*(9), 1242–64. doi: 10.1016/j.neunet.2005.08.005
- Lisman, J. E. (1997). Bursts as a unit of neural information: making unreliable synapses reliable. *Trends Neurosci*, *20*(1), 38–43. doi: 10.1016/S0166-2236(96)10070-9
- Luo, A. H., Tahsili-Fahadan, P., Wise, R. A., Lupica, C. R., & Aston-Jones, G. (2011). Linking context with reward: a functional circuit from hippocampal CA3 to ventral tegmental area. *Science*, *333*(6040), 353–7. doi: 10.1126/science.1204622
- McNaughton, B. L., Battaglia, F. P., Jensen, O., Moser, E. I., & Moser, M.-B. (2006). Path integration and the neural basis of the ‘cognitive map’. *Nat Rev Neurosci*, *7*, 663–678.
- Mehta, M. R., Barnes, C. A., & McNaughton, B. L. (1997). Experience-dependent, asymmetric expansion of hippocampal place fields. *Proc Natl Acad Sci U S A*, *94*(16), 8918–21.
- Mehta, M. R., Lee, A. K., & Wilson, M. A. (2002). Role of experience and oscillations in transforming a rate code into a temporal code. *Nature*, *417*(6890), 741–6. doi: 10.1038/nature00807
- Mehta, M. R., Quirk, M. C., & Wilson, M. A. (2000). Experience-dependent asymmetric shape of hippocampal receptive fields. *Neuron*, *25*(3), 707–15.
- Monaco, J. D., Knierim, J. J., & Zhang, K. (2011). Sensory feedback, error correction, and remapping in a multiple oscillator model of place-cell activity. *Front Comput Neurosci*, *5*, 39. doi: 10.3389/fncom.2011.00039
- Monaco, J. D., Rao, G., Roth, E. D., & Knierim, J. J. (2014). Attentive scanning behavior drives one-trial potentiation of hippocampal place fields. *Nat Neurosci*, *17*(5), 725–731. doi: 10.1038/nn.3687

- Moser, E. I., & Moser, M.-B. (2008). A metric for space. *Hippocampus*, *18*(12), 1142–56. doi: 10.1002/hipo.20483
- O’Keefe, J., & Burgess, N. (2005). Dual phase and rate coding in hippocampal place cells: theoretical significance and relationship to entorhinal grid cells. *Hippocampus*, *15*, 853–866.
- O’Keefe, J., & Recce, M. L. (1993). Phase relationship between hippocampal place units and the EEG theta rhythm. *Hippocampus*, *3*(3), 317–30. doi: 10.1002/hipo.450030307
- Remme, M. W. H., Lengyel, M., & Gutkin, B. S. (2010). Democracy-independence trade-off in oscillating dendrites and its implications for grid cells. *Neuron*, *66*(3), 429–37. doi: 10.1016/j.neuron.2010.04.027
- Rennó-Costa, C., & Tort, A. B. L. (2017). Place and grid cells in a loop: Implications for memory function and spatial coding. *J Neurosci*, *37*(34), 8062–8076. doi: 10.1523/JNEUROSCI.3490-16.2017
- Rossant, C., Leijon, S., Magnusson, A. K., & Brette, R. (2011). Sensitivity of noisy neurons to coincident inputs. *J Neurosci*, *31*(47), 17193–206. doi: 10.1523/JNEUROSCI.2482-11.2011
- Ruan, M., Young, C. K., & McNaughton, N. (2017). Bi-directional theta modulation between the septo-hippocampal system and the mammillary area in free-moving rats. *Front Neural Circuits*, *11*, 62. doi: 10.3389/fncir.2017.00062
- Sartor, G. C., & Aston-Jones, G. S. (2012). A septal-hypothalamic pathway drives orexin neurons, which is necessary for conditioned cocaine preference. *J Neurosci*, *32*(13), 4623–31. doi: 10.1523/JNEUROSCI.4561-11.2012
- Savelli, F., Luck, J., Knierim, J. J., & Bhalla, U. S. (2017). Framing of grid cells within and beyond navigation boundaries. *eLife*, *6*, e21354. doi: 10.7554/eLife.21354
- Savelli, F., Yoganarasimha, D., & Knierim, J. J. (2008). Influence of boundary removal on the spatial representations of the medial entorhinal cortex. *Hippocampus*, *18*(12), 1270–1282. doi: 10.1002/hipo.20511
- Schmidt, R., Diba, K., Leibold, C., Schmitz, D., Buzsáki, G., & Kempter, R. (2009). Single-trial phase precession in the hippocampus. *J Neurosci*, *29*(42), 13232–41. doi: 10.1523/JNEUROSCI.2270-09.2009
- Skaggs, W. E., McNaughton, B. L., Gothard, K., & Markus, E. (1993). An information theoretic approach to deciphering the hippocampal code. In *Advances in neural information processing systems* (Vol. 5, pp. 1030–7). San Mateo, CA: Morgan Kaufman.

- Skaggs, W. E., McNaughton, B. L., Wilson, M. A., & Barnes, C. A. (1996). Theta phase precession in hippocampal neuronal populations and the compression of temporal sequences. *Hippocampus*, 6(2), 149–172.
- Solstad, T., Boccara, C. N., Kropff, E., Moser, M.-B., & Moser, E. I. (2008). Representation of geometric borders in the entorhinal cortex. *Science*, 322(5909), 1865–8. doi: 10.1126/science.1166466
- Stensola, T., Stensola, H., Moser, M.-B., & Moser, E. I. (2015). Shearing-induced asymmetry in entorhinal grid cells. *Nature*, 518(7538), 207–12. doi: 10.1038/nature14151
- Takamura, Y., Tamura, R., Zhou, T. L., Kobayashi, T., Tran, A. H., Eifuku, S., & Ono, T. (2006). Spatial firing properties of lateral septal neurons. *Hippocampus*, 16(8), 635–44. doi: 10.1002/hipo.20196
- Traub, R. D., Wong, R. K., Miles, R., & Michelson, H. (1991). A model of a CA3 hippocampal pyramidal neuron incorporating voltage-clamp data on intrinsic conductances. *J Neurophysiol*, 66(2), 635–50.
- Tsanov, M., Chah, E., Wright, N., Vann, S. D., Reilly, R., Erichsen, J. T., ... O'Mara, S. M. (2011, 20). Oscillatory entrainment of thalamic neurons by theta rhythm in freely moving rats. *J Neurophysiol*, 105(1), 4–17. doi: 10.1152/jn.00771.2010
- Tsao, A., Moser, M.-B., & Moser, E. I. (2013). Traces of experience in the lateral entorhinal cortex. *Curr Biol*, 23(5), 399–405. doi: 10.1016/j.cub.2013.01.036
- Vertes, R. P., Albo, Z., & Viana Di Prisco, G. (2001). Theta-rhythmically firing neurons in the anterior thalamus: implications for mnemonic functions of Papez's circuit. *Neuroscience*, 104(3), 619–625.
- Wallenstein, G. V., & Hasselmo, M. E. (1997). GABAergic modulation of hippocampal population activity: sequence learning, place field development, and the phase precession effect. *J Neurophysiol*, 78(1), 393–408.
- Welday, A. C., Shlifer, I. G., Bloom, M. L., Zhang, K., & Blair, H. T. (2011). Cosine directional tuning of theta cell burst frequencies: evidence for spatial coding by oscillatory interference. *J Neurosci*, 31(45), 16157–76. doi: 10.1523/JNEUROSCI.0712-11.2011
- Widloski, J., & Fiete, I. R. (2014). A model of grid cell development through spatial exploration and spike time-dependent plasticity. *Neuron*, 83(2), 481–95. doi: 10.1016/j.neuron.2014.06.018
- Williams, J. M., & Givens, B. (2003). Stimulation-induced reset of hippocampal theta in the freely

- performing rat. *Hippocampus*, 13(1), 109-16. doi: 10.1002/hipo.10082
- Wills, T. J., Cacucci, F., Burgess, N., & O'Keefe, J. (2010). Development of the hippocampal cognitive map in preweanling rats. *Science*, 328(5985), 1573-6. doi: 10.1126/science.1188224
- Yartsev, M. M., Witter, M. P., & Ulanovsky, N. (2011, Nov). Grid cells without theta oscillations in the entorhinal cortex of bats. *Nature*, 479(7371), 103-7. doi: 10.1038/nature10583
- Zhang, K. (1996). Representation of spatial orientation by the intrinsic dynamics of the head-direction cell ensemble: a theory. *J Neurosci*, 16(6), 2112-26.
- Zilli, E. A., & Hasselmo, M. E. (2010). Coupled noisy spiking neurons as velocity-controlled oscillators in a model of grid cell spatial firing. *J Neurosci*, 30(41), 13850-60. doi: 10.1523/JNEUROSCI.0547-10.2010
- Zilli, E. A., Yoshida, M., Tahvildari, B., Giocomo, L. M., & Hasselmo, M. E. (2009). Evaluation of the oscillatory interference model of grid cell firing through analysis and measured period variance of some biological oscillators. *PLoS Comput Biol*, 5(11), e1000573. doi: 10.1371/journal.pcbi.1000573

## Supplementary Figures | Spatial Theta Cells in Competitive Burst Synchronization Networks: Reference Frames from Phase Codes

Joseph D. Monaco, Hugh T. Blair, Kechen Zhang

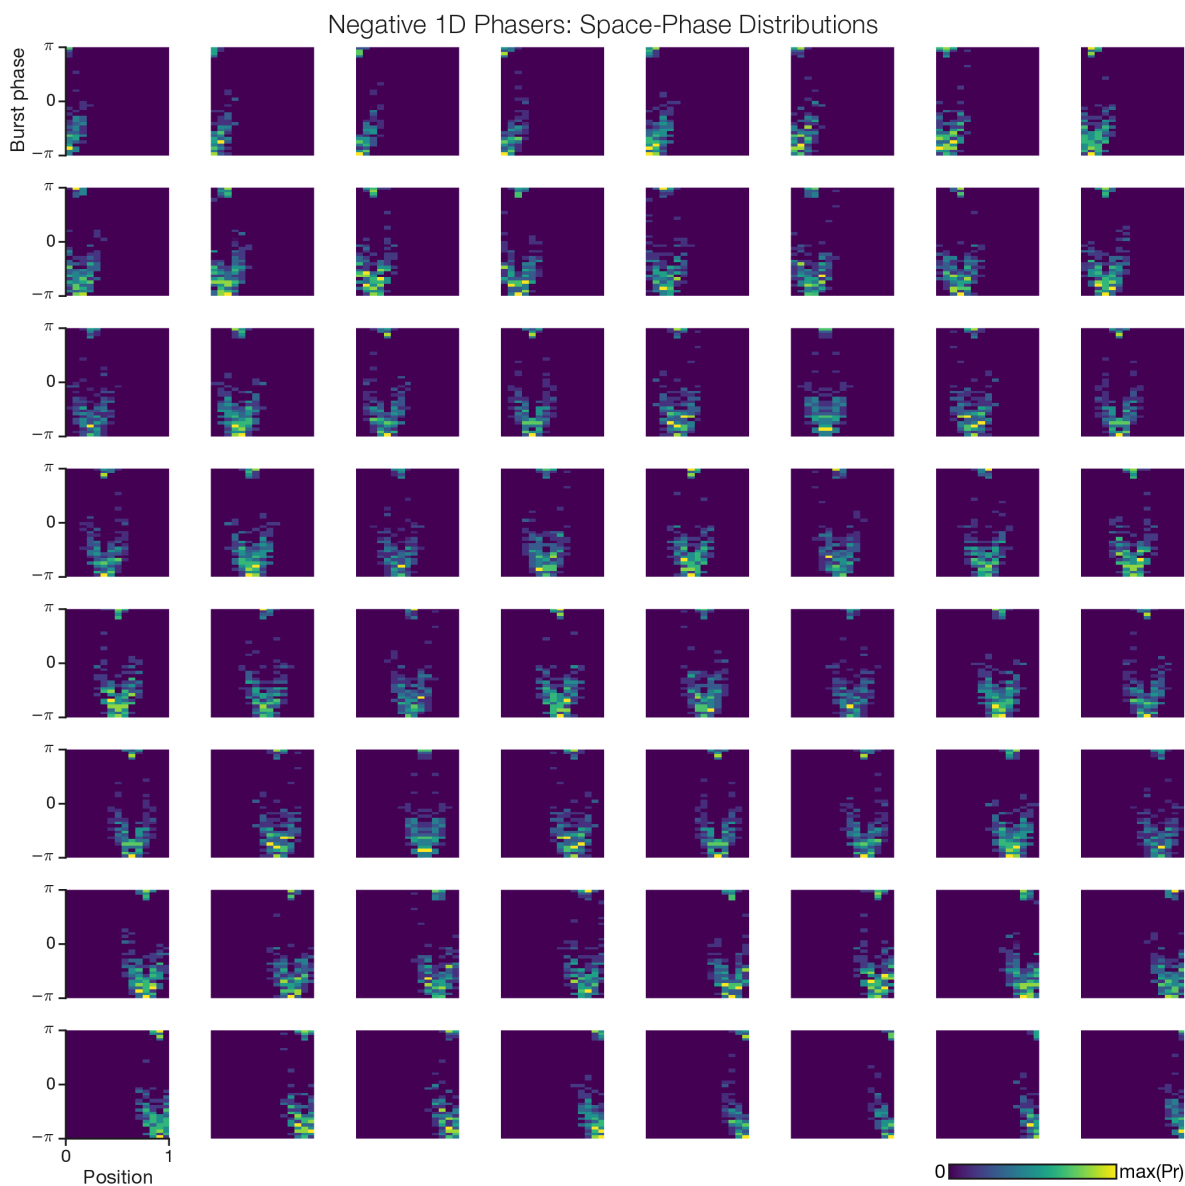

**Supplementary Figure 1 | Spatiotemporal activity of 1D spatial network: Negative phasers.** This grid shows, from left-to-right and top-to-bottom, the joint space-phase distributions for all negative phaser cells driven by a local tuning function in the network (Figure 2A) from  $x = 0$  to  $x = 1$ . The middle plot corresponds to the top left of Figure 2B.

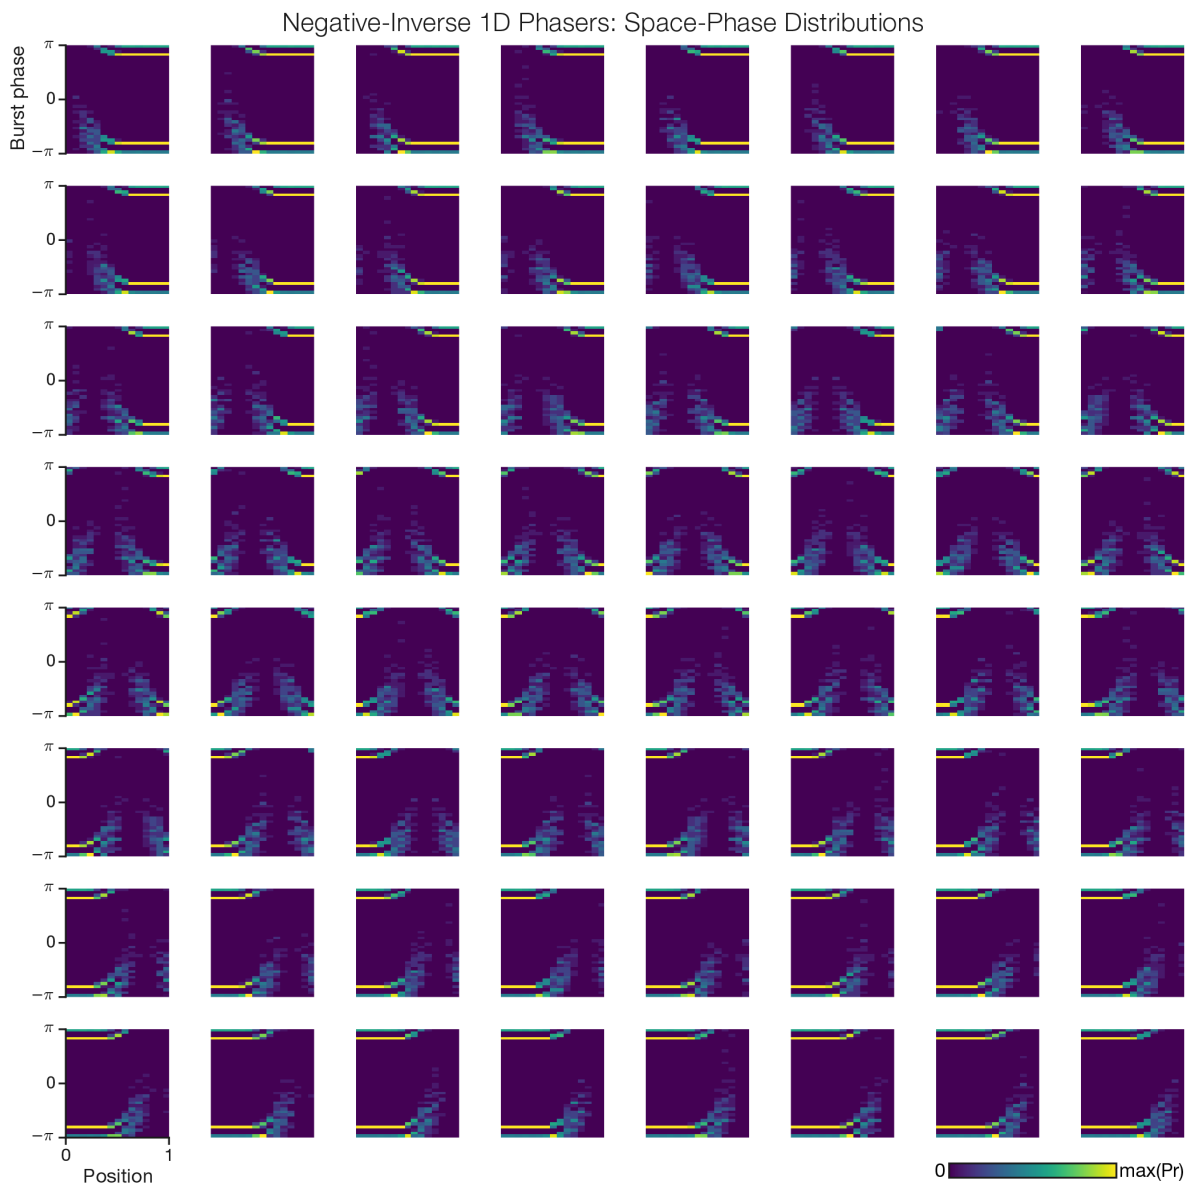

**Supplementary Figure 2 | Spatiotemporal activity of 1D spatial network: Negative/Inverse phasers.**

This grid shows, from left-to-right and top-to-bottom, the joint space-phase distributions for all negative phaser cells driven by an inverse (long-range) tuning function in the network (Figure 2A) from  $x = 0$  to  $x = 1$ . The middle plot corresponds to the bottom left of Figure 2B.

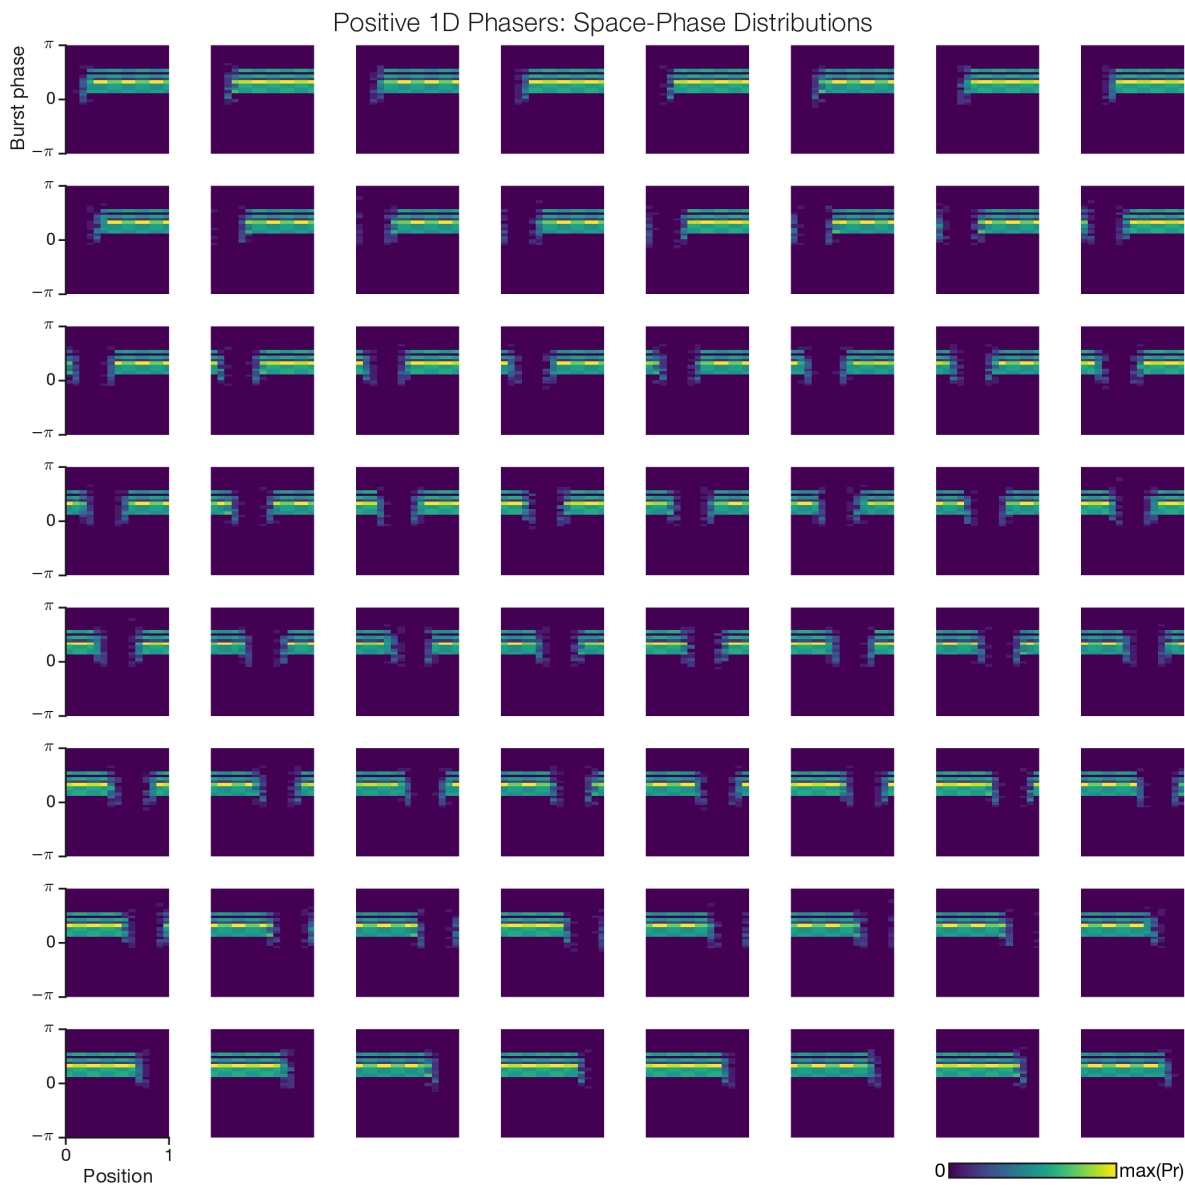

**Supplementary Figure 3 | Spatiotemporal activity of 1D spatial network: Positive phasers.** This grid shows, from left-to-right and top-to-bottom, the joint space-phase distributions for all positive phaser cells suppressed by a local negative phaser in the network (Figure 2A) from  $x = 0$  to  $x = 1$ . The middle plot corresponds to the top right of Figure 2B.

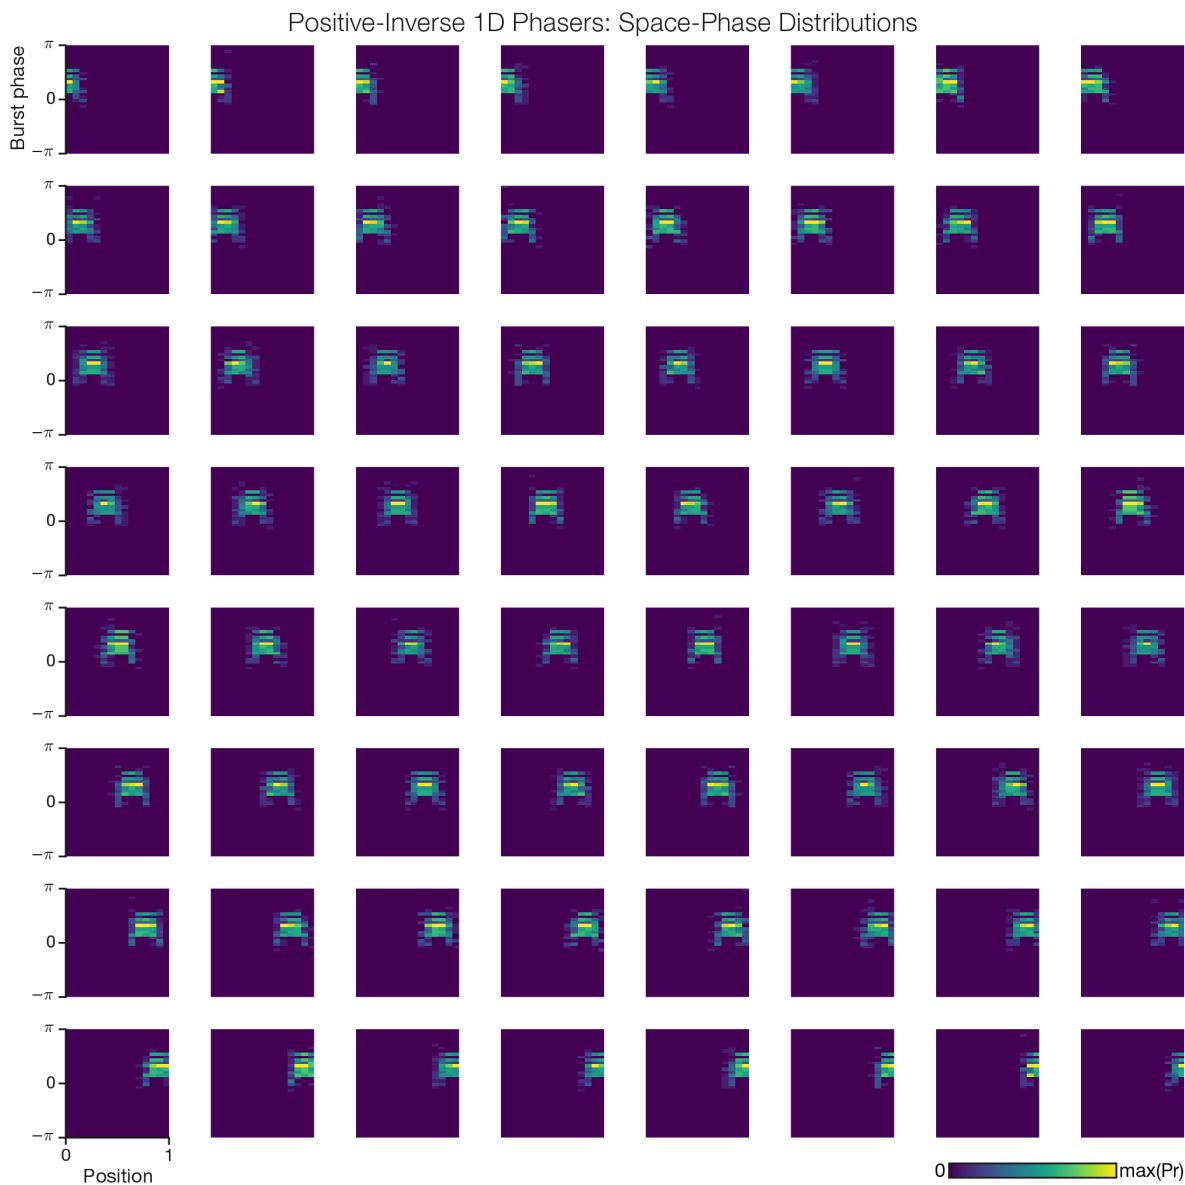

**Supplementary Figure 4 | Spatiotemporal activity of 1D spatial network: Positive/Inverse phasers.**

This grid shows, from left-to-right and top-to-bottom, the joint space-phase distributions for all positive phaser cells suppressed by an inverse (long-range) negative phaser in the network (Figure 2A) from  $x = 0$  to  $x = 1$ . The middle plot corresponds to the bottom right of Figure 2B.



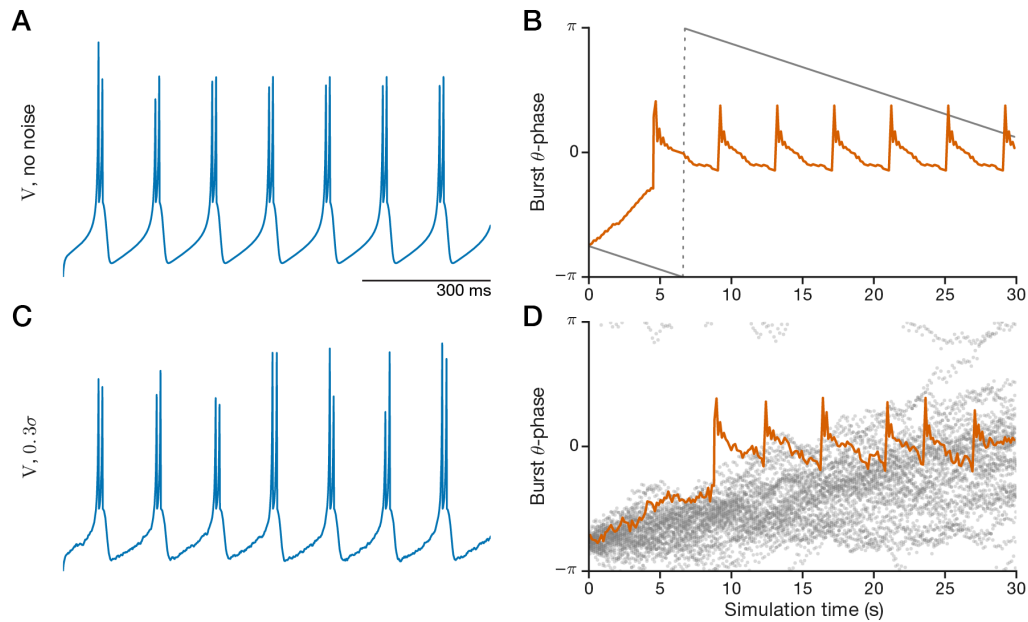

**Supplementary Figure 5 | Theta-bursting neuron with phase noise: drift and pulse synchronization.**

An intrinsic bursting model (equation (6); Izhikevich, 2007) was tuned with constant input (Table 4) to fire doublet bursts (A) close to the reference theta frequency, 7.5 Hz. The difference between the reference and the actual burst rate, 7.519 bursts/s, means that the cell's theta phase (B) slowly drifts (precesses) over time (gray line). To test whether this cell can be phase-synchronized by periodic stimulation, we simulated an instantaneous pulse ( $V \leftarrow V + 15\text{mV}$ ) every other theta cycle at zero phase. The pulse-synchronized theta cell (B, orange line) monotonically precesses toward zero phase and then (around  $t = 5$  s) discontinuously jumps past zero phase before slowly precessing to just before zero phase. This dynamic, of jumping forward and precessing back, repeats (around  $t = 9$  s) and continues stereotypically. This sawtooth pattern encapsulates the theta-synchronization dynamics of this cell. For our phaser synchronization simulations, we added phase noise to this 'target burster' cell (equation (6)) to show that the synchronization can overcome intrinsic noise. We chose a noise level (Table 4) that preserved the cell's theta bursting (C, same as Figure 3A, inset) but largely randomized its burst theta-phase over the 30-s simulation (D, gray circles, 36 trials). With phase noise, the pulse stimulation reproduced the sawtooth pattern of synchronization (D, orange line).

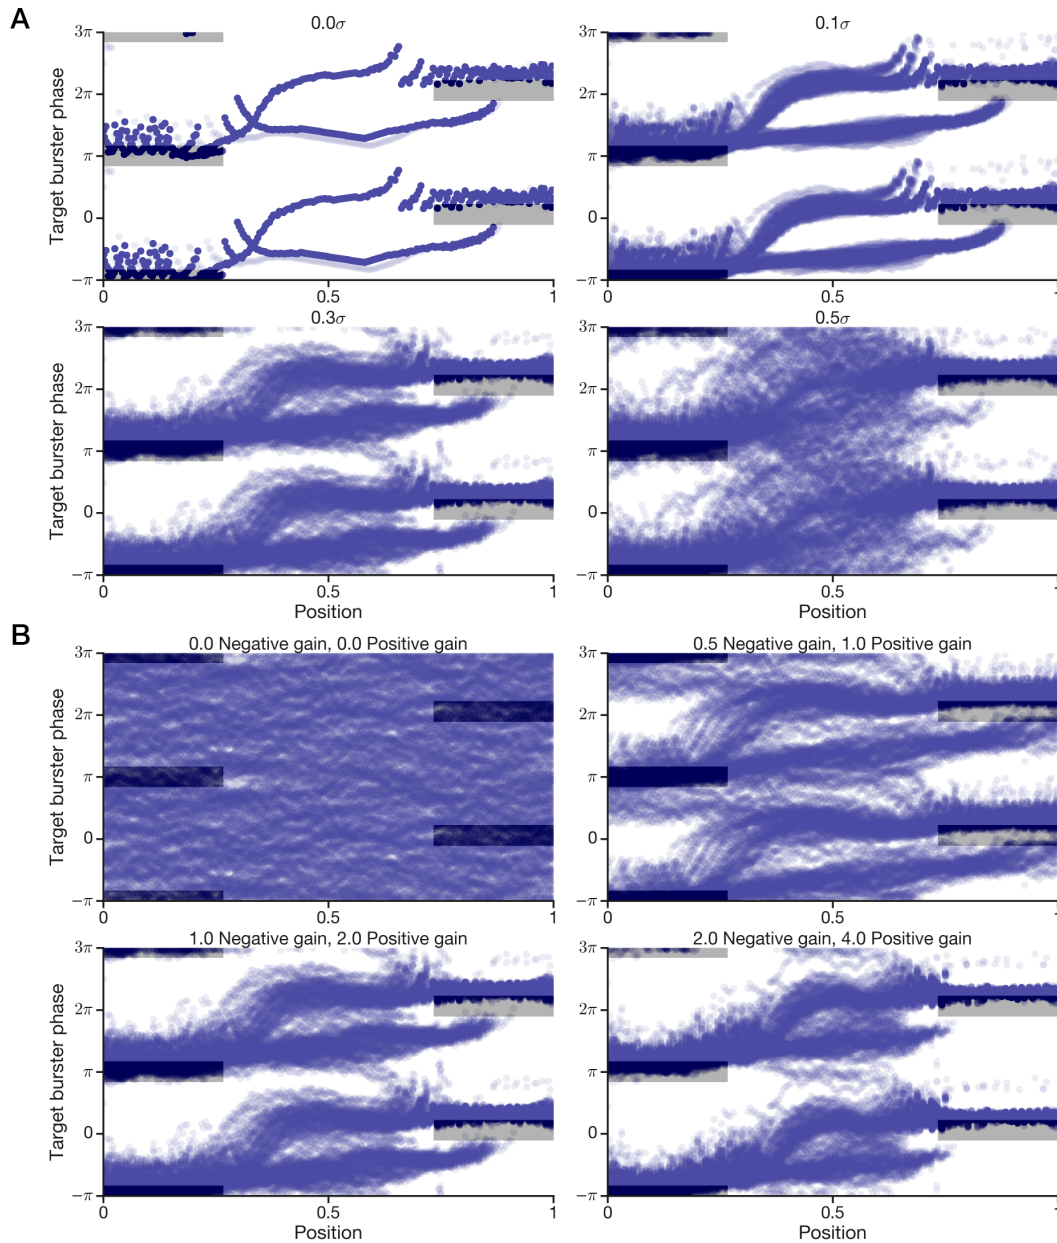

**Supplementary Figure 6 | 1D phaser synchronization across noise and gain levels.** Here we show additional 1-hr simulations of the 1D spatial synchronization network shown in Figure 3. (A) With the gain from the phasers fixed (Table 4), simulations with  $0.0\sigma$ ,  $0.1\sigma$ ,  $0.3\sigma$ , and  $0.5\sigma$  noise levels demonstrate that the phase-code fixed points remain functional at various noise levels. (B) With the noise level fixed at  $0.3\sigma$ , the effect of zero phaser gain (top left) can be compared to weaker (top right) and stronger (bottom right) levels of phaser gain. Weak phaser gain (top right) still synchronizes the target burster, but the phase trajectories are extended due to the slower development of phase locking on approaches toward  $x = 0$  and  $x = 1$ .

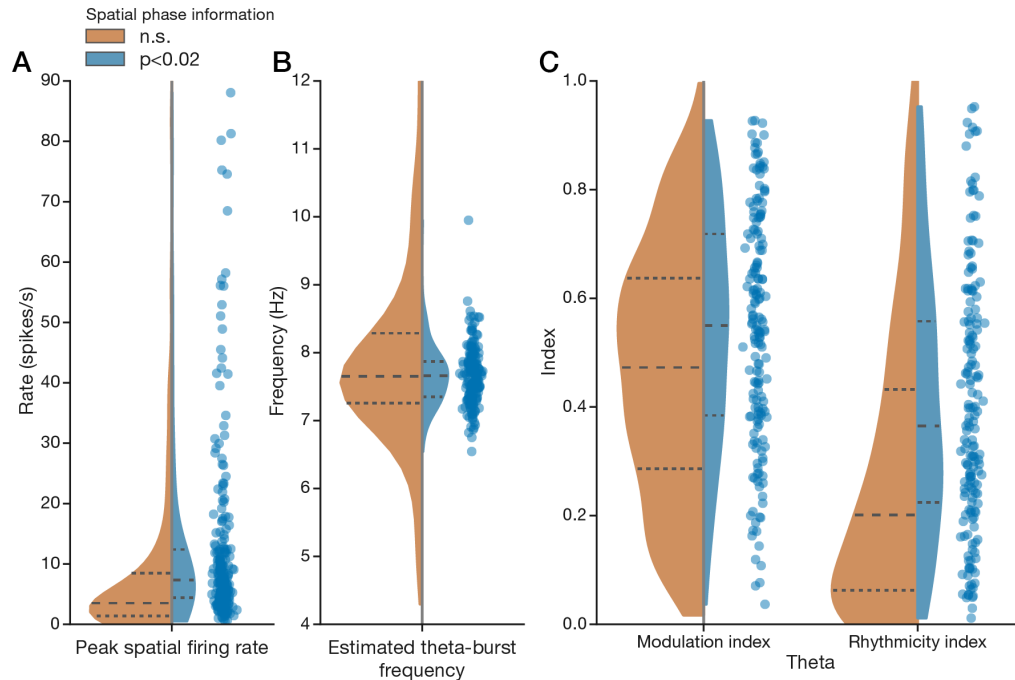

**Supplementary Figure 7 | Spatial theta cells are rhythmically normal.** For comparison, we show distributions for theta cell recordings split into groups with non-significant (n.s.; ‘nonspatial’;  $n = 840$ ) or significant ( $p < 0.02$ ; ‘spatial’;  $n = 233$ ) spatial phase information (Methods). Gaussian kernel-density estimates (using Scott’s bandwidth rule) of splits are normalized by group size and show medians (long-dash lines) and quartiles (short-dash lines). Scatter points are additionally shown for the spatial data. Peak firing rate (A) and autocorrelogram-based estimates of theta-burst frequency (B; Methods) are similarly distributed for nonspatial and spatial recordings. Theta indexes for modulation and rhythmicity (C; Methods) show that spatial recordings are distributed slightly higher, but this is likely due to the lower modes evident for nonspatial recordings which may consist of borderline or non-theta cells. Thus spatial theta cells have similar firing rate and oscillatory characteristics to theta cells in our dataset.

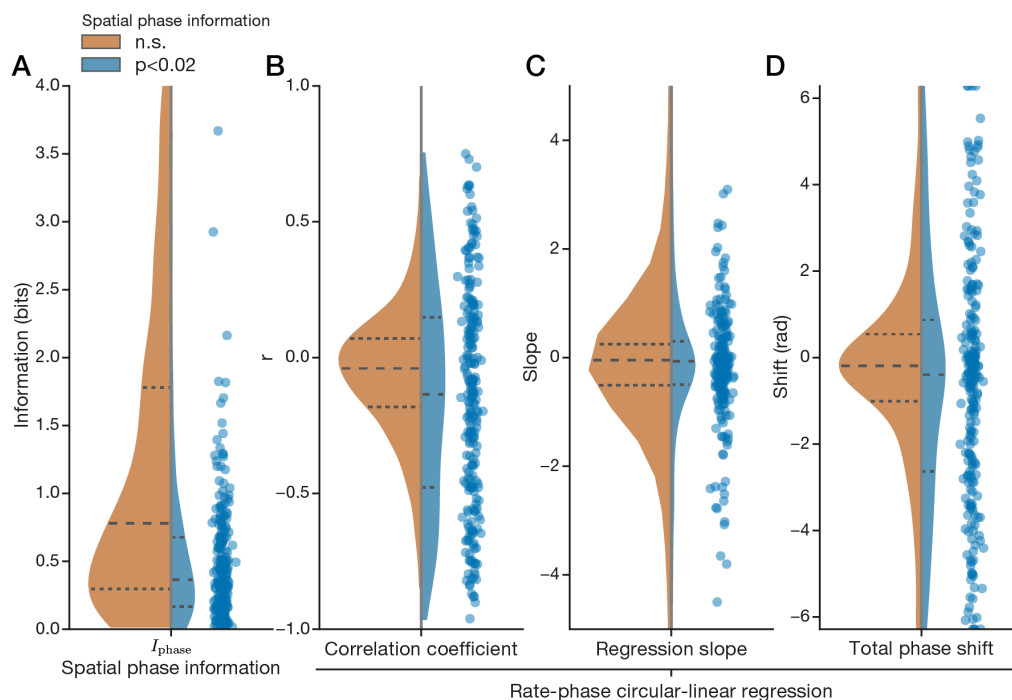

**Supplementary Figure 8 | Spatial theta cells have broadly distributed rate-phase correlations.** Similar to Supplementary Figure 7, we show distributions of theta cell recordings split into groups with non-significant (n.s.; ‘nonspatial’;  $n = 840$ ) or significant ( $p < 0.02$ ; ‘spatial’;  $n = 233$ ) spatial phase information (Methods). (A)  $I_{\text{phase}}$  for spatial cells has median 0.36 bits/spike (long-dash line) with a positively skewed distribution and wide range. (B-D) Circular-linear regressions of average phase onto average rate based on spatial map pixels. Nonspatial recordings were distributed around zero. Estimates for correlation coefficient (B) and total phase shift (D; Methods) show broader distributions for spatial than nonspatial cells: Compare quartiles (short-dash lines) and fatter tails reflecting excess negative/positive correlations. Total phase shift (D) is computed as a rate-normalized slope (C).

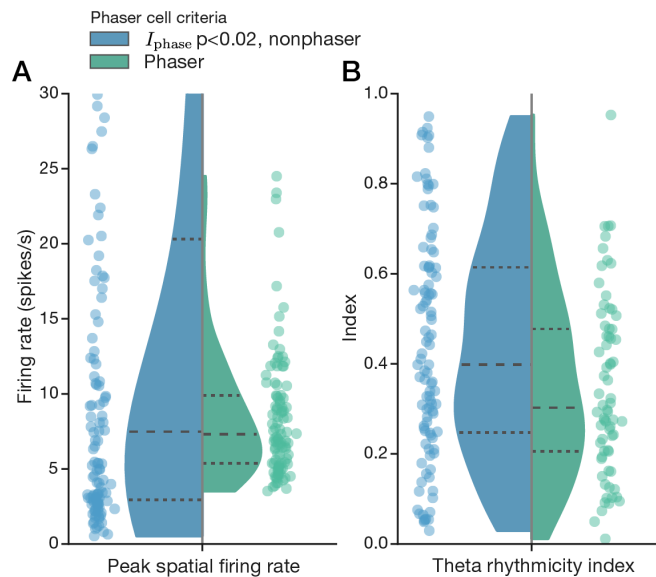

**Supplementary Figure 9 | Biological phaser cells have a restricted range of firing rates.** The phaser criteria (Results) selected 101/233 recordings from 5/8 rats. Similar to the split distributions in Supplementary Figure 7, we show distributions comparing spatial theta cell recordings not selected ('nonphaser';  $n = 233$ ) or selected ('phaser';  $n = 101$ ) as biological phaser cells. Peak firing rates (A) for phasers had the same median but a qualitatively restricted range compared to nonphasers (but note that a minimum firing rate of 3.5 spikes/s is one of the phaser criteria and the  $y$ -axis truncates, for clarity, nonphaser data that is shown in Supplementary Figure 7A). Theta rhythmicity (B) was similarly distributed for nonphaser and phaser recordings.

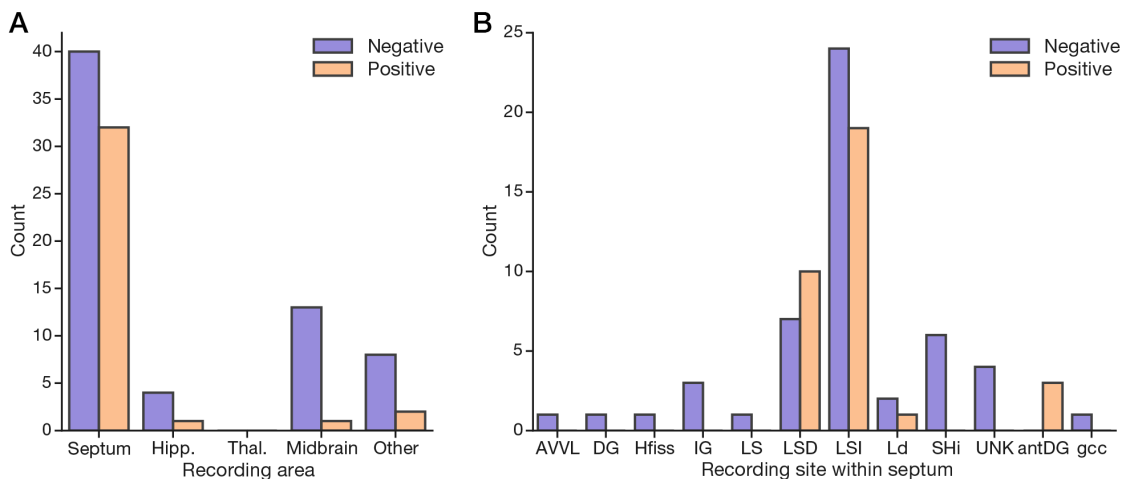

**Supplementary Figure 10 | Anatomical distribution of biological phaser cell recordings.** (A) Recording counts for brain areas indicating negative and positive biological phasers. Hipp. = hippocampus; Thal. = thalamus; Other includes nucleus accumbens, caudate nucleus, putamen, and CgSHi (TKTK). (B) Recording counts for sites proximal to or within the septum. AVVL = TKTK; (ant)DG = (anterior) dentate gyrus; Hfiss = hippocampal fissure; IG = TKTK; LS(D/I) = lateral septum (dorsal/intermediate); Ld = TKTK; SHi = TKTK; UNK = unknown; gcc = TKTK. **Note: TKTK indicates definitions that will be updated in the next manuscript revision.**

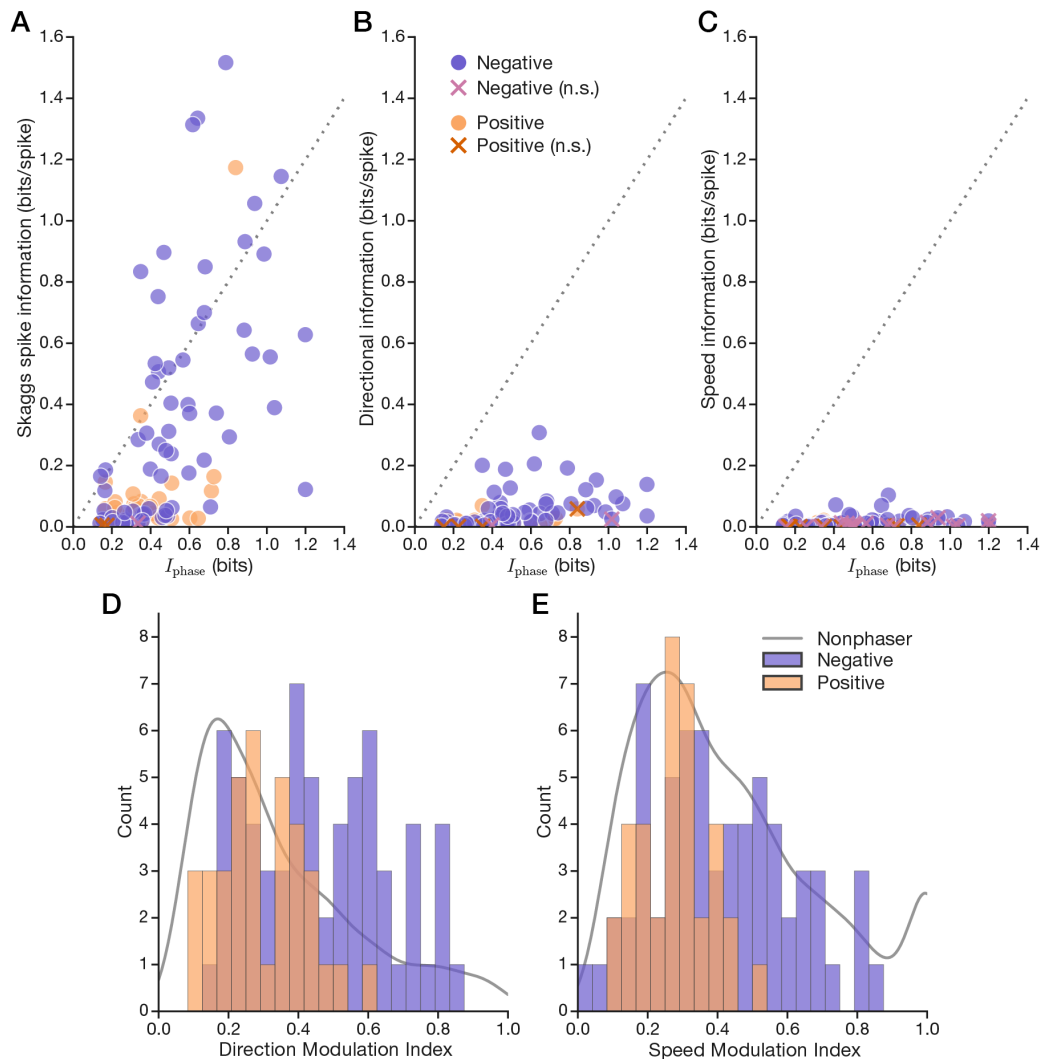

**Supplementary Figure 11 | Trajectory modulation reveals bias in biological phaser recordings.** The phaser model is based on spatial inputs mediating the correlation between rate and phase. However, biological phasers are recorded in a constrained environment in animals with constrained behaviors, and the hippocampal theta rhythm is strongly speed-modulated (Fuhrmann et al., 2015). (A-C) To evaluate whether the phasers depend on trajectory-based factors, we compare spatial phase information with spike information content (Methods) for position (A, Skaggs measure), direction (B), and speed (C). Most phasers carry strong position information (A), but a minority carry relatively low direction (B) or speed (C) information. (D+E) Histograms of firing-rate modulation indexes for direction (D) and speed (E) for negative/positive phasers (positive composited over negative). Phaser firing rates were substantially modulated by direction and speed. Gray line, kernel-density estimate (0.05 bandwidth Gaussian) of nonphaser recordings (arbitrary scale for comparison).

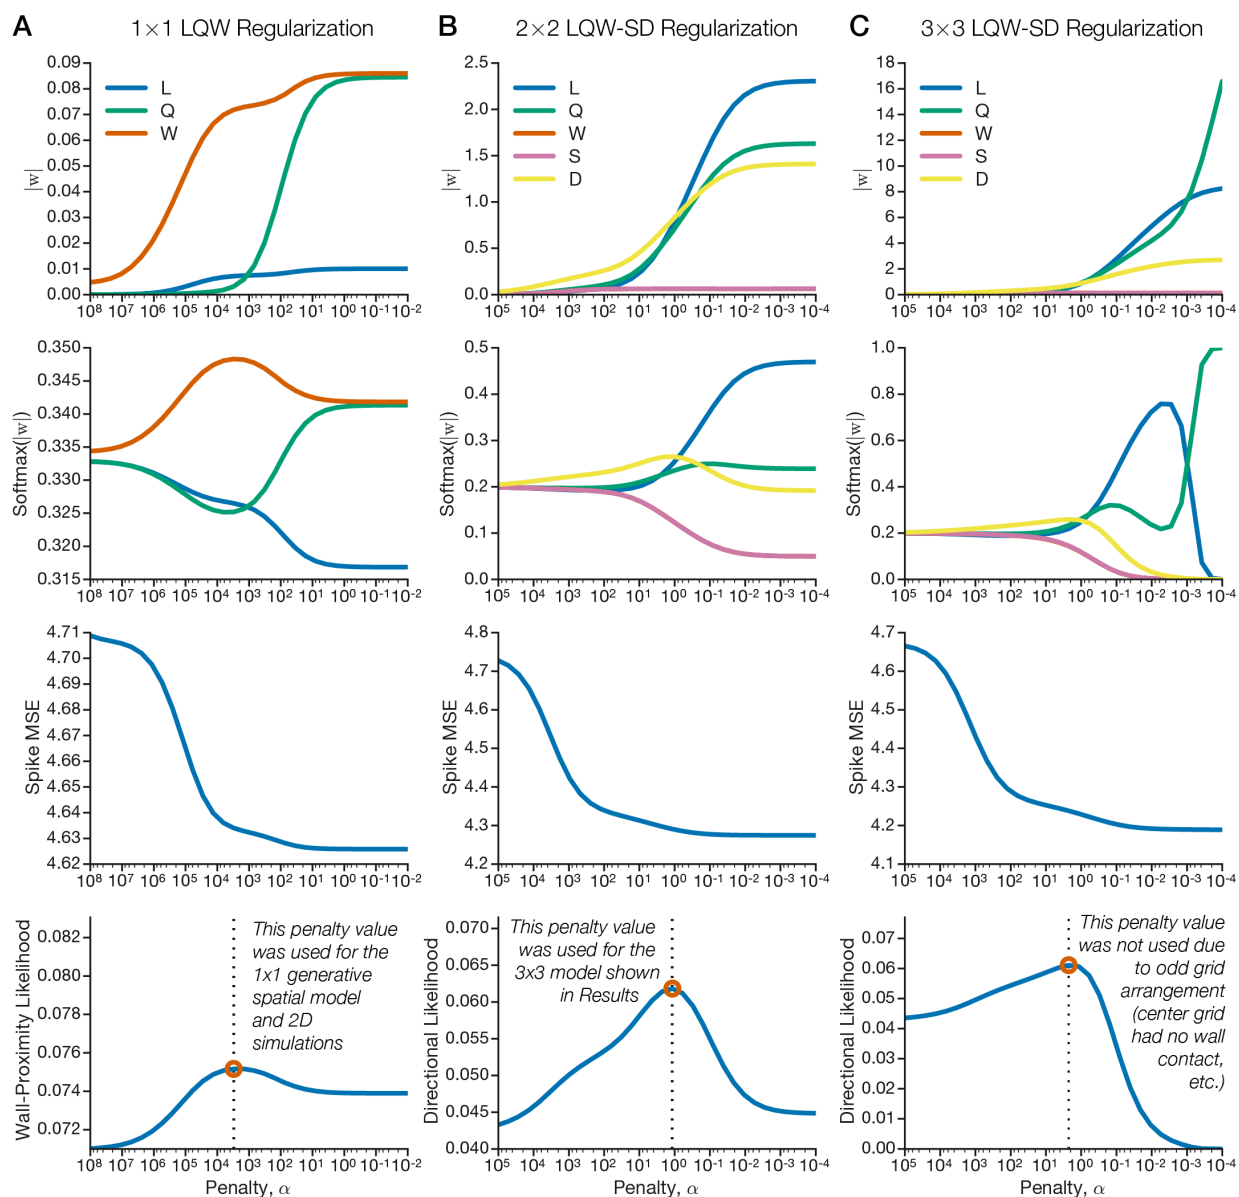

### Supplementary Figure 12 | Ridge regularization and shrinkage curves for training GLM models. We

trained a series of GLMs to predict spike counts in 300-ms intervals based on spatial (*LQW*) and/or trajectory-based (*SD*) variables (Methods). For the model analysis (Results), the model was trained and tested on a  $3 \times 3$  spatial grid (C); however, the penalty parameter used for training was derived by optimizing the  $2 \times 2$  model (B). Both values were similar, but the  $2 \times 2$  value (B, bottom) was used because the directional likelihood was strongly peaked and the model better captured wall responses (the center grid of the  $3 \times 3$  model was isolated from the walls). The GLM that we used to generate spatial inputs for 2D phaser simulations was only trained on the spatial variables (A,  $1 \times 1$ ). (top) Absolute model weights for each variable. (second row) Softmax normalization of absolute model weights. (third row) Mean squared error (MSE) of spike-count predictions. (last row) Model likelihood is the the softmax  $W$  (A) or  $D$  (B+C) curve divided by the spike MSE (Methods). The maximum likelihood  $\alpha$  parameter (red circle) is chosen as the  $\ell_2$ -regularization penalty.

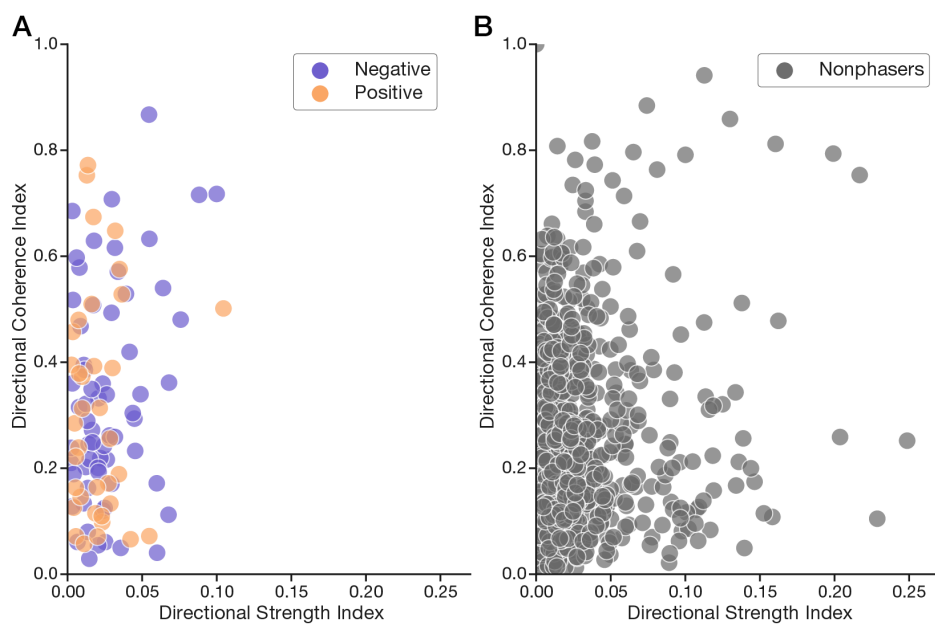

**Supplementary Figure 13 | Directional strength and coherence indexes based on GLM weights.** The magnitude and direction of the 9 directional vectors from the  $3 \times 3$  GLM were used to compute DSI and DCI, respectively (Methods). Both phasers (A) and nonphasers (B) had a wide range of DCI (*y*-axis), but phasers (A) were restricted to overall low DSI (*x*-axis). The GLM revealed moderately directional responses among nonphasers (B) but only low directionality among phasers (A).



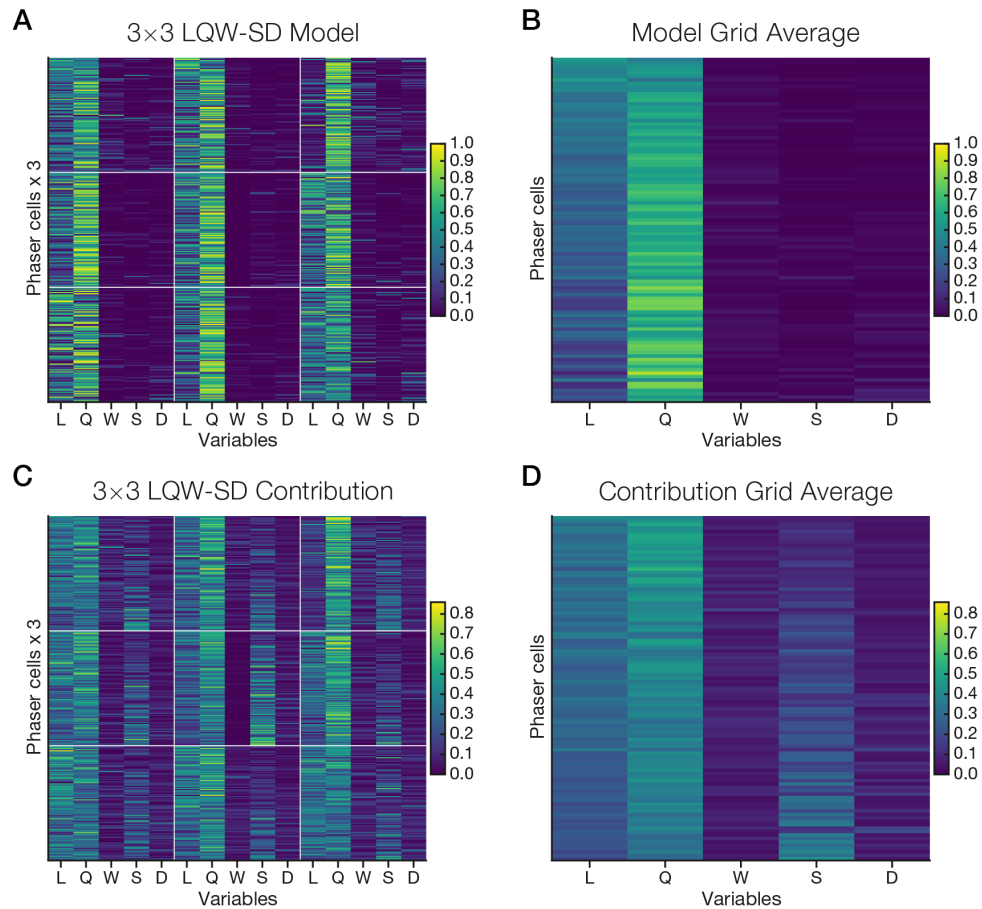

**Supplementary Figure 14 | Phaser GLM weights and contributions for every cell and grid section.** Full  $3 \times 3$  GLM weights (A+B) and contributions (C+D) for each unique phaser cell (averaged across recordings) are shown in pseudocolor matrix plots. For visualization, cells are presented in the same order in every grid section and grid average, according to the expected value of the cell's grid-averaged model weights to the left (toward *L*, more spatial) or right (toward *D*, more trajectory-based). To reveal model structure, each variable row in a grid section is sum-normalized and the corresponding grid plots (A+B, C+D) share colorscales.

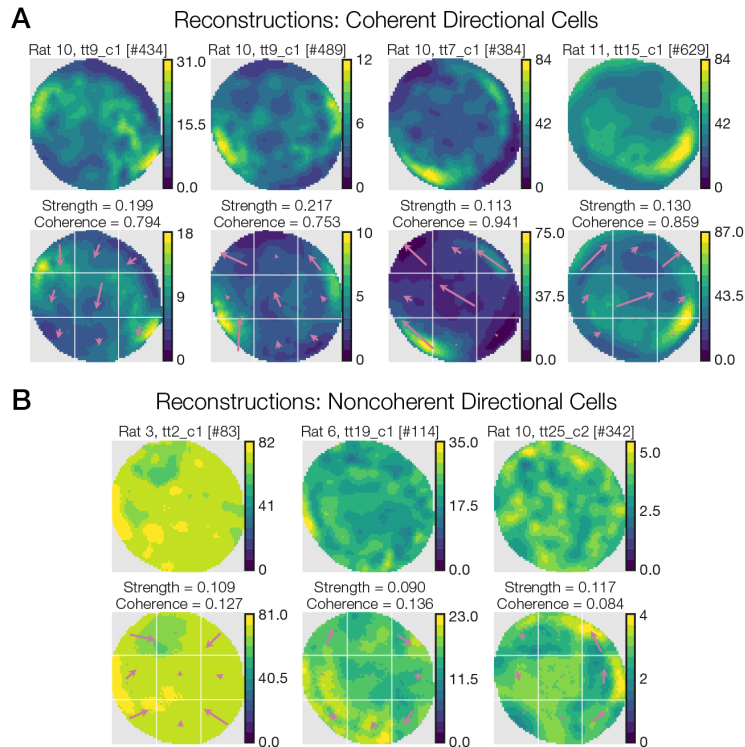

**Supplementary Figure 15 | GLM reconstructions of highly directional cells.** To show that the LQW-SD  $3 \times 3$  model can accurately reconstruct ratemaps of directional cells, we show examples of coherent (A) and noncoherent (B) directionality. (A) The high peak firing rates and crescent-like spatial modulation indicate that these may be head-direction cells or cells with head-direction inputs. The model's directional predictors (arrows) are consistently large and well-aligned across grid sections. (B) Recordings with low coherence showed minimal spatial modulation but included directional patterns such as center-facing (left) and clockwise (middle) or anti-clockwise (right) directionality.

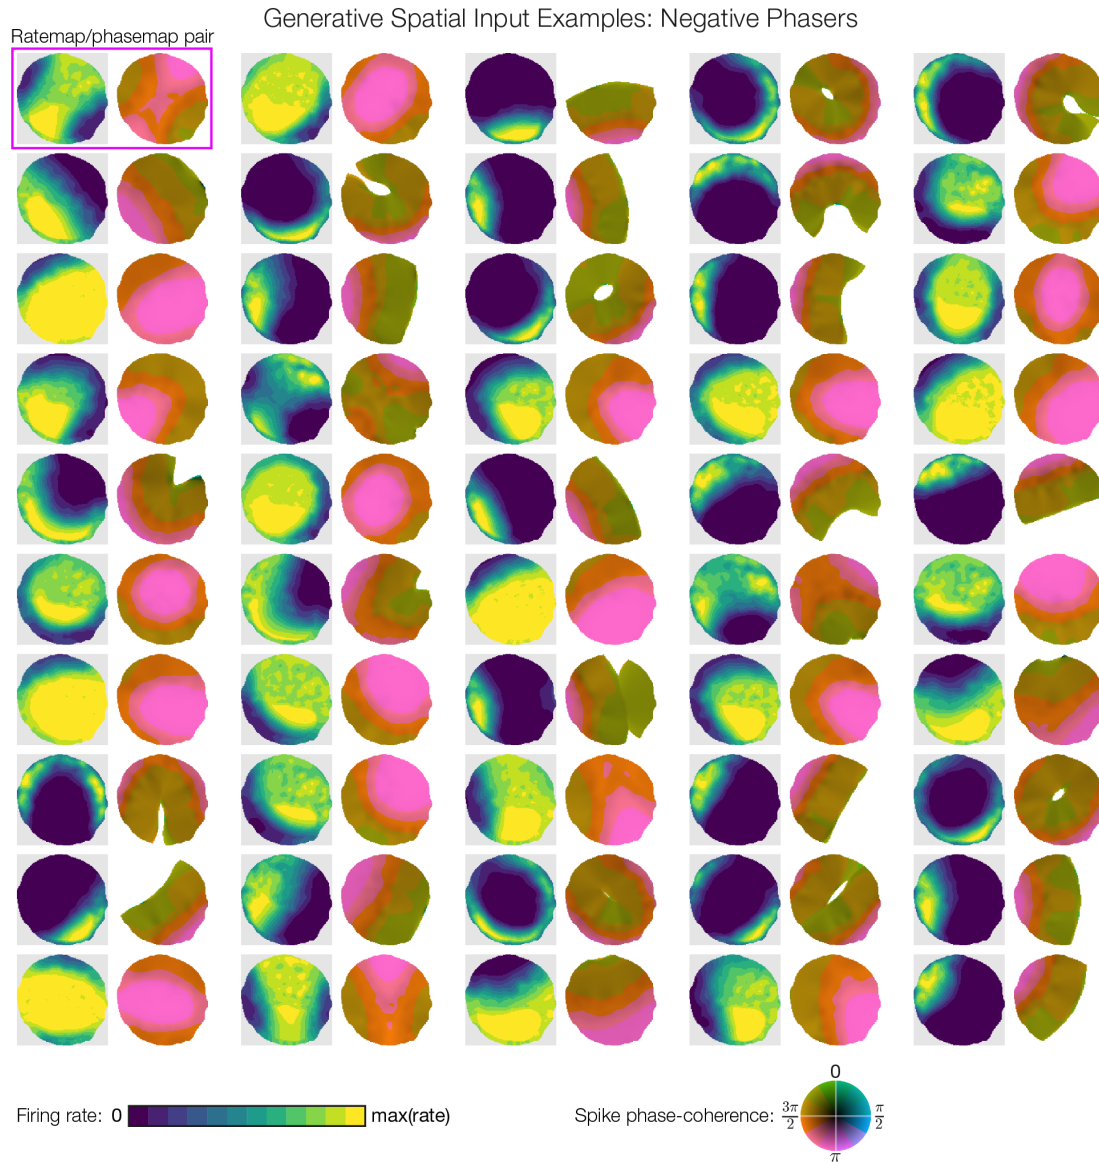

**Supplementary Figure 16 | Example negative phasers in 2D synchronization simulations.** Ratemap/phasemap pairs are shown for 50/1,000 negative phasers in the 2D simulations (Figure 9). The rate and phase response of each phaser is driven by a randomly sampled spatial function from the LQW generative model (Figure 8F-J). In the phasemaps, note that the phasers precess from pre-theta-peak (greens; see phase-coherence color wheel at bottom) to theta-trough (pinks) for low- to high-firing regions. Missing phasemap pixels reflect lack of nearby spikes for spatial averaging.

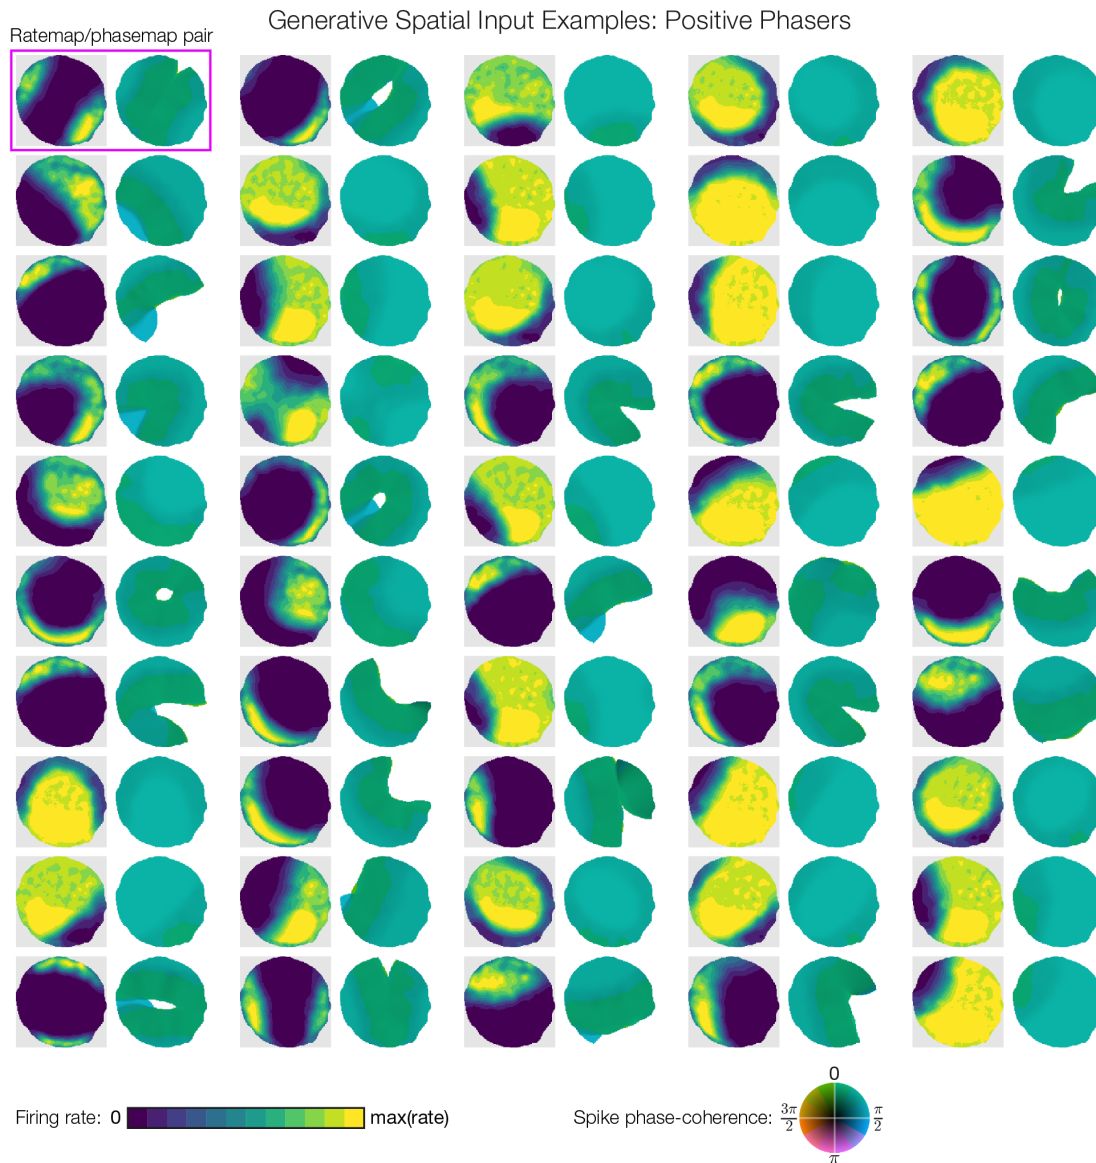

**Supplementary Figure 17 | Example positive phasers in 2D synchronization simulations.** Ratemap/phasemap pairs are shown for 50/1,000 positive phasers in the 2D simulations (Figure 9). The rate and phase response of each phaser is driven by suppression from a negative phaser with an LQW-generated spatial input (Supplementary Figure 16). In the phasemaps, note that the phasers process from theta-peak (greens) to halfway through the falling phase (blue/green;  $\pi/2$  phase). As for the 1D model (Figure 1) and biological phasers (Figure 6), the positive procession is shallower than the negative precession. Missing phasemap pixels reflect lack of nearby spikes for spatial averaging.

## Supplementary Movies | Spatial Theta Cells in Competitive Burst Synchronization Networks: Reference Frames from Phase Codes

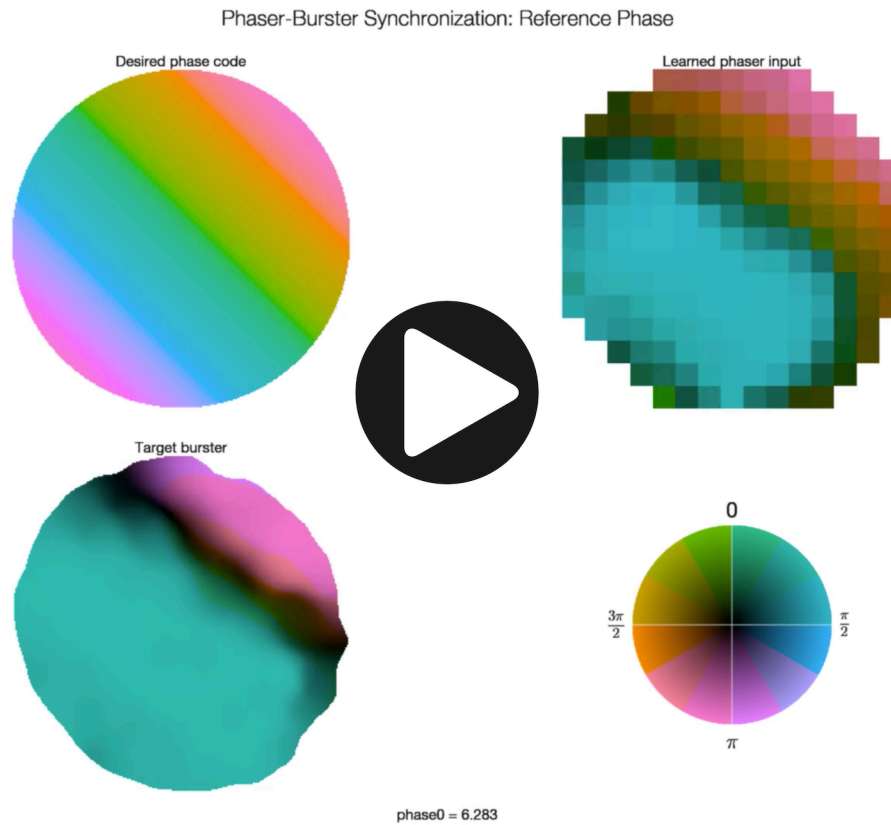

**Supplementary Movie 1 | Spatial phaser synchronization across reference phase.** The spatial phase codes in Figure 9B differ by reference phase, which determines the spatial offsets of the pattern. Here we show a movie in which the frames iterate through 10-min phaser-target simulations of different reference phases. The desired phase code moves smoothly along the 45° diagonal for a complete cycle so the movie can be looped. The broad negative/positive (pink/blue) synchronization regions compete to cover the environment as the phase code travels.

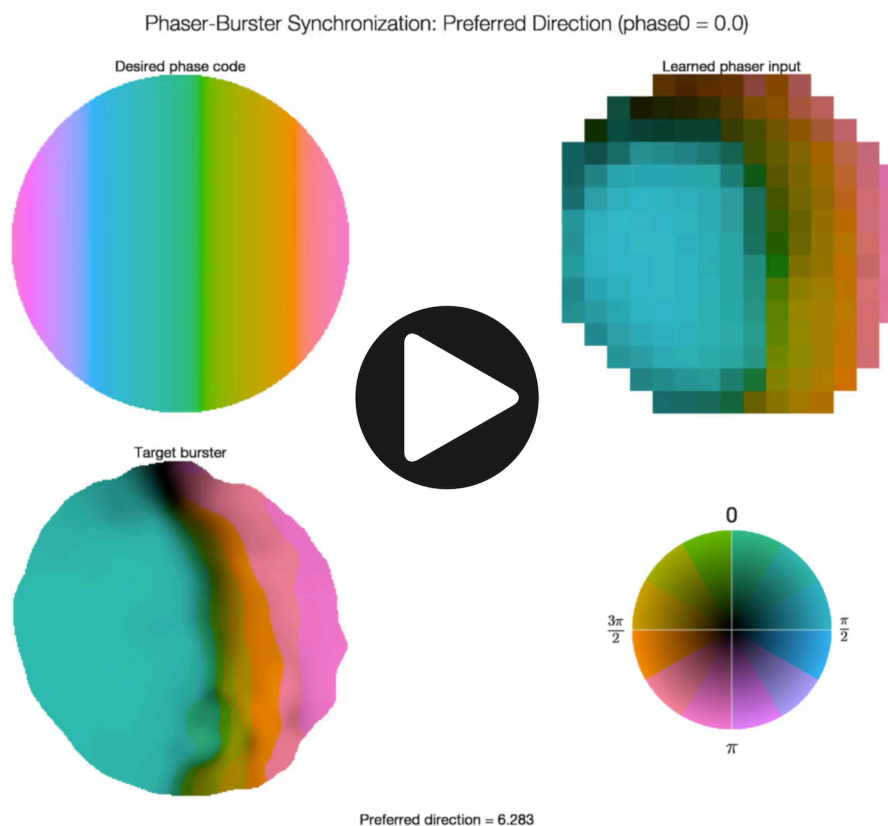

**Supplementary Movie 2 | Spatial phaser synchronization across preferred direction: Phase code 1.**

The spatial phase codes in Figure 9B have a  $45^\circ$  preferred direction, which determines the orientation of the pattern. Here we show a movie in which the frames iterate through 10-min phaser-target simulations of different preferred directions. The desired phase code rotates smoothly for a complete cycle so the movie can be looped. With this reference phase (0.0, at the center of the arena), the negative phasers synchronize a boundary region (oranges/pinks) along the preferred direction as the phase code rotates.

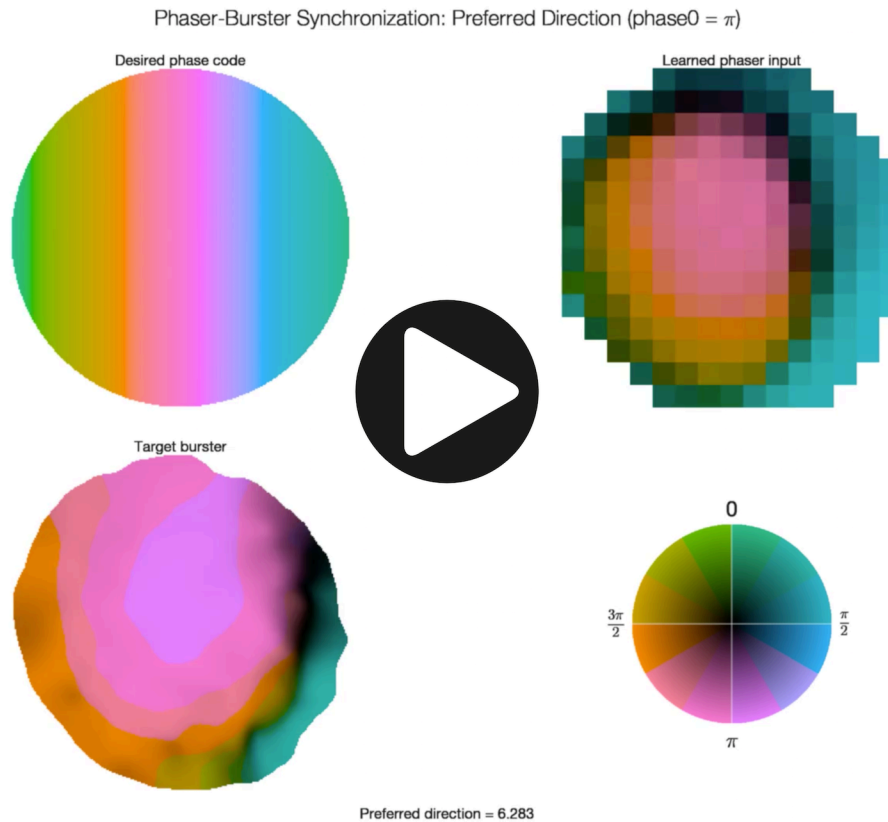

**Supplementary Movie 3 | Spatial phaser synchronization across preferred direction: Phase code 2.**

The spatial phase codes in Figure 9B have a  $45^\circ$  preferred direction, which determines the orientation of the pattern. Here we show a movie in which the frames iterate through 10-min phaser-target simulations of different preferred directions. The desired phase code rotates smoothly for a complete cycle so the movie can be looped. With this reference phase ( $\pi$ , at the center of the arena), the positive phasers synchronize a boundary region (blue/green) along the preferred direction as the phase code rotates.
